# Supplementary material
Source: PubMed Central journal article supplement (PMC9709698)
Supplement: mmc1.pdf [file mmc1.pdf]

## Supporting Information

### Discovery of Novel Thioquinazoline-*N*-aryl-acetamide/*N*-arylacetohydrazide Hybrids as Anti-SARS-CoV-2 Agents: Synthesis, *In vitro* Biological Evaluation, and Molecular Docking Studies

Heba T. Abdel-Mohsen\*<sup>a</sup>, Mohamed A. Omar<sup>a</sup>, Omnia Kutkat<sup>b</sup>, Ahmed M. El Kerdawy<sup>c</sup>, Alaa A. Osman<sup>d</sup>, Mohamed GabAllah<sup>b</sup>, Ahmed Mostafa\*<sup>b</sup>, Mohamed A. Ali<sup>b</sup>, Hoda I. El Diwani<sup>a</sup>

<sup>a</sup>*Department of Chemistry of Natural and Microbial Products, Pharmaceutical and Drug Industries Research Institute, National Research Centre, El-Buhouth St., Dokki, P.O. Box 12622, Cairo, Egypt*

<sup>b</sup>*Center of Scientific Excellence for Influenza Viruses, National Research Centre, Giza 12622, Egypt.*

<sup>c</sup>*Department of Pharmaceutical Chemistry, Faculty of Pharmacy, Cairo University, Kasr El-Aini Street, Cairo, P.O. Box 11562, Egypt.*

<sup>d</sup>*Department of Pharmaceutical Chemistry, School of Pharmacy, NewGiza University (NGU), NewGiza, km 22 Cairo–Alexandria Desert Road, Cairo, Egypt*

\* Corresponding authors. Email address: [ht.abdel-mohsen@nrc.sci.eg](mailto:ht.abdel-mohsen@nrc.sci.eg) and [hebabdelmohsen@gmail.com](mailto:hebabdelmohsen@gmail.com) (Heba T. Abdel-Mohsen); A.M. ([ahmed\\_elsayed@daad-alumni.de](mailto:ahmed_elsayed@daad-alumni.de))

| <b>Contents</b>                                                                                                                           | <b>Page</b> |
|-------------------------------------------------------------------------------------------------------------------------------------------|-------------|
| <b>1. NMR spectra of thioquinazoline-<i>N</i>-aryl-acetamide / <i>N</i>-arylacetohydrazide hybrids (Fig. 1-38).</b>                       | <b>3</b>    |
| <b>2. Dose-inhibition curves of the synthesized derivatives against NRC-03-nhCoV and Vero-E6 cells (Fig. 39).</b>                         | <b>41</b>   |
| <b>3. 2D diagrams of the synthesized compounds showing their interactions in M<sup>pro</sup> active site (PDB ID: 7LTJ) (Fig. 40-59).</b> | <b>42</b>   |

NMR spectra of thioquinazoline-*N*-aryl-acetamide / *N*-arylacetohydrazide hybrids (Fig. 1-20).

2-(2-((4-Oxo-3,4-dihydroquinazolin-2-yl)thio)acetamido)benzoic acid (**11a**)

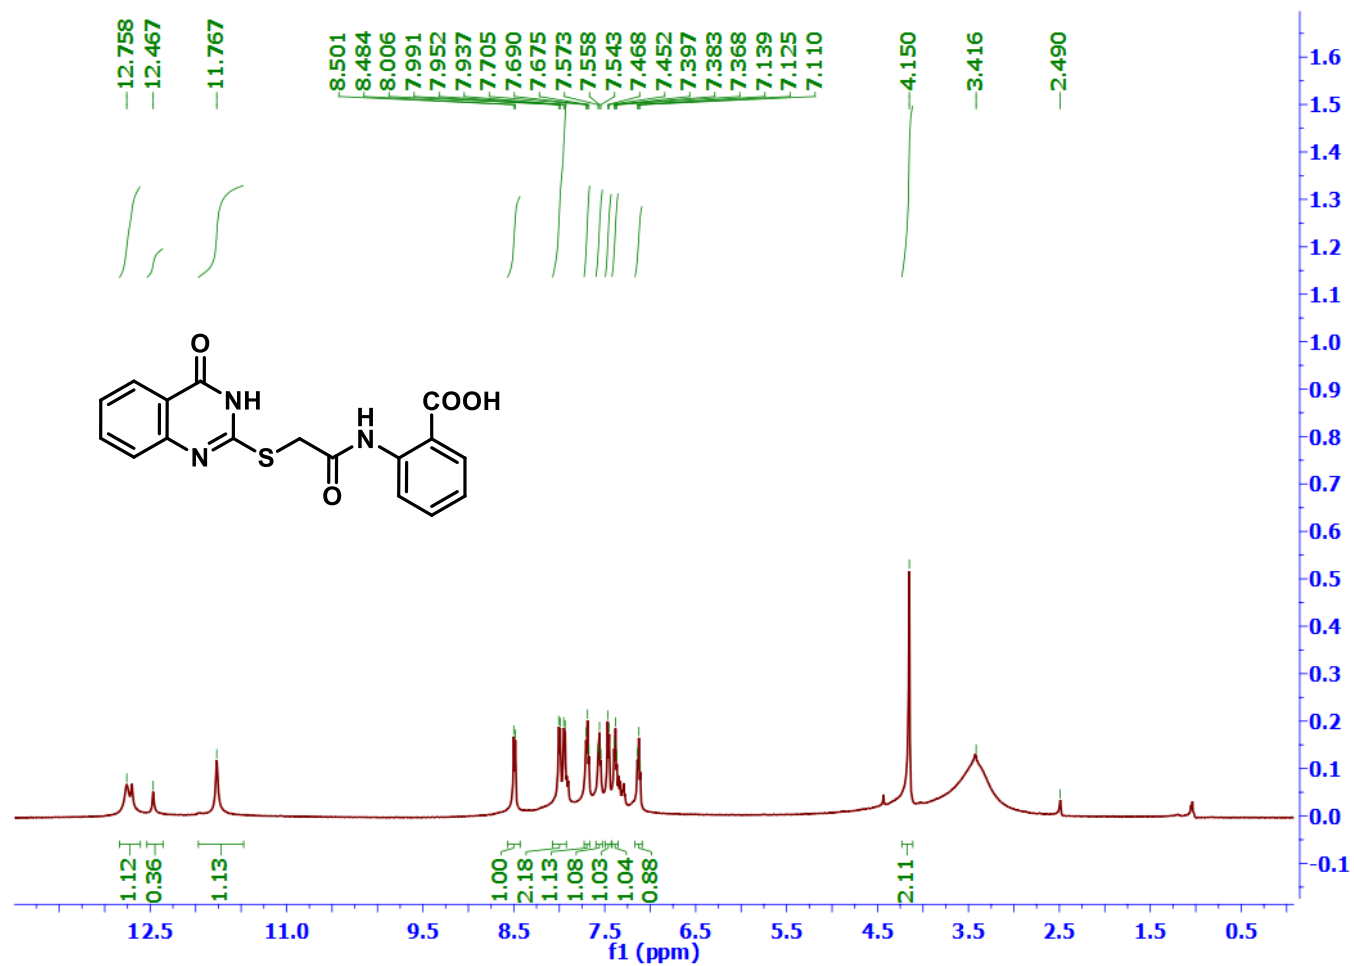

Fig. 1. <sup>1</sup>H (500 MHz) NMR spectrum of **11a** in DMSO-*d*<sub>6</sub>

2-(2-((4-Oxo-3,4-dihydroquinazolin-2-yl)thio)acetamido)benzoic acid (**11a**)

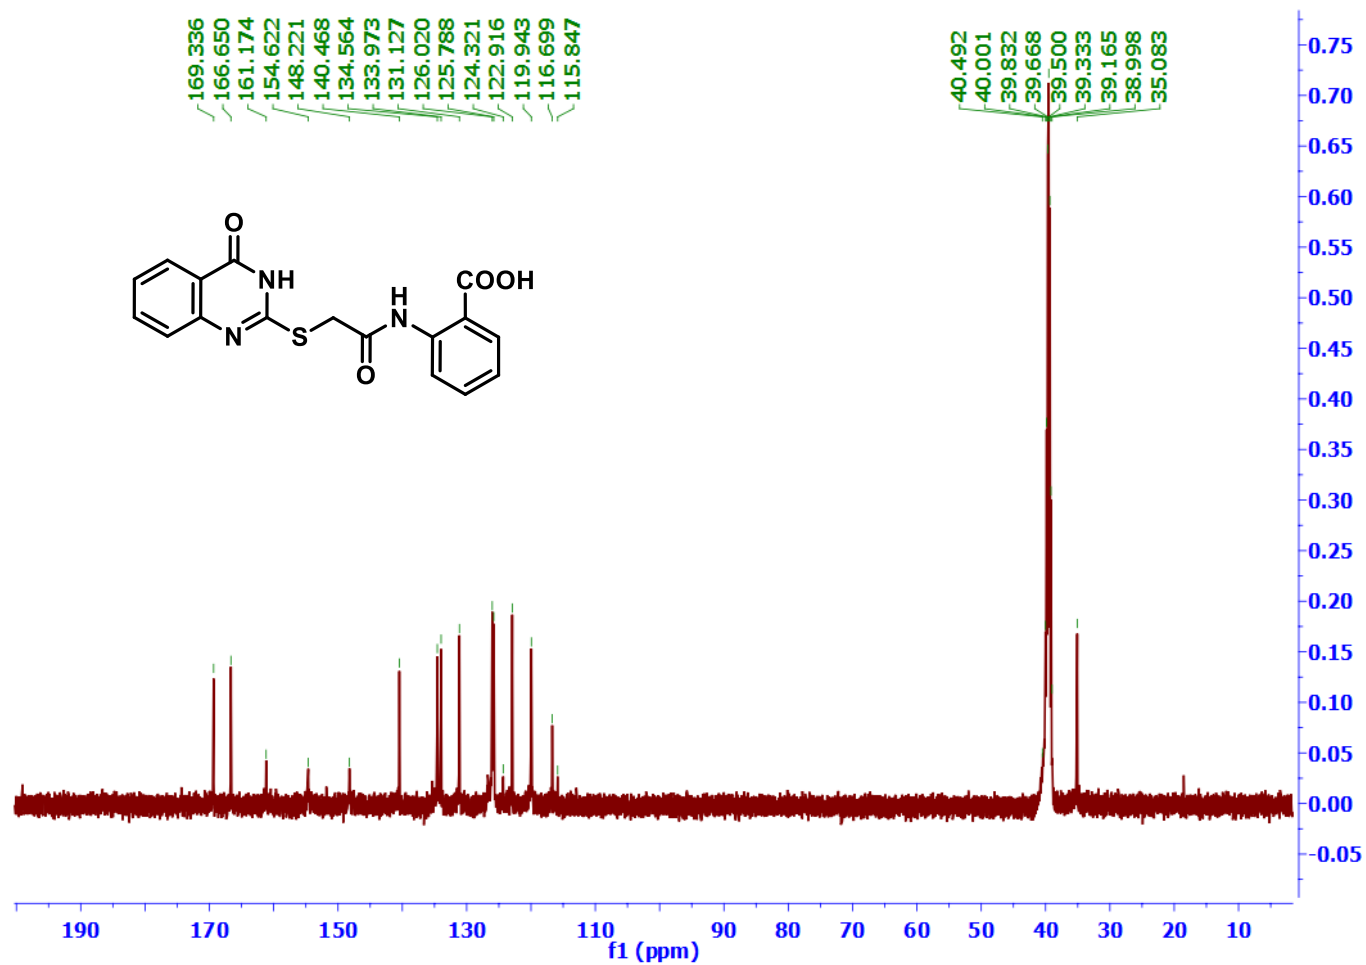

Fig. 2.  $^{13}\text{C}$  (125 MHz) NMR spectrum of **11a** in  $\text{DMSO-}d_6$

3-(2-((4-Oxo-3,4-dihydroquinazolin-2-yl)thio)acetamido)benzoic acid (**11b**)

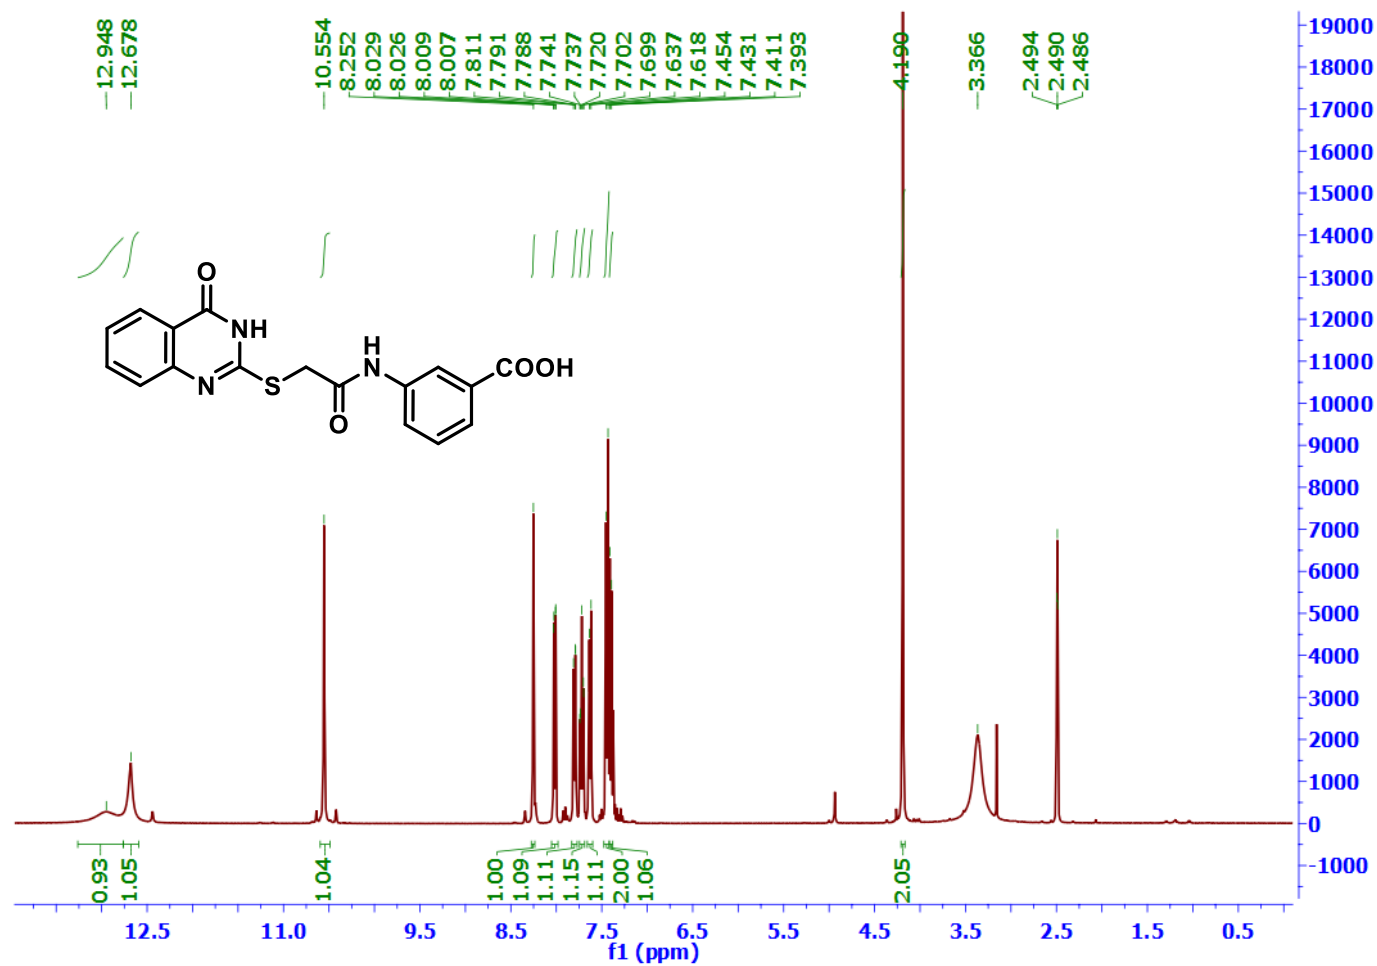

Fig. 3. <sup>1</sup>H (400 MHz) NMR spectrum of **11b** in DMSO-*d*<sub>6</sub>

3-(2-((4-Oxo-3,4-dihydroquinazolin-2-yl)thio)acetamido)benzoic acid (**11b**)

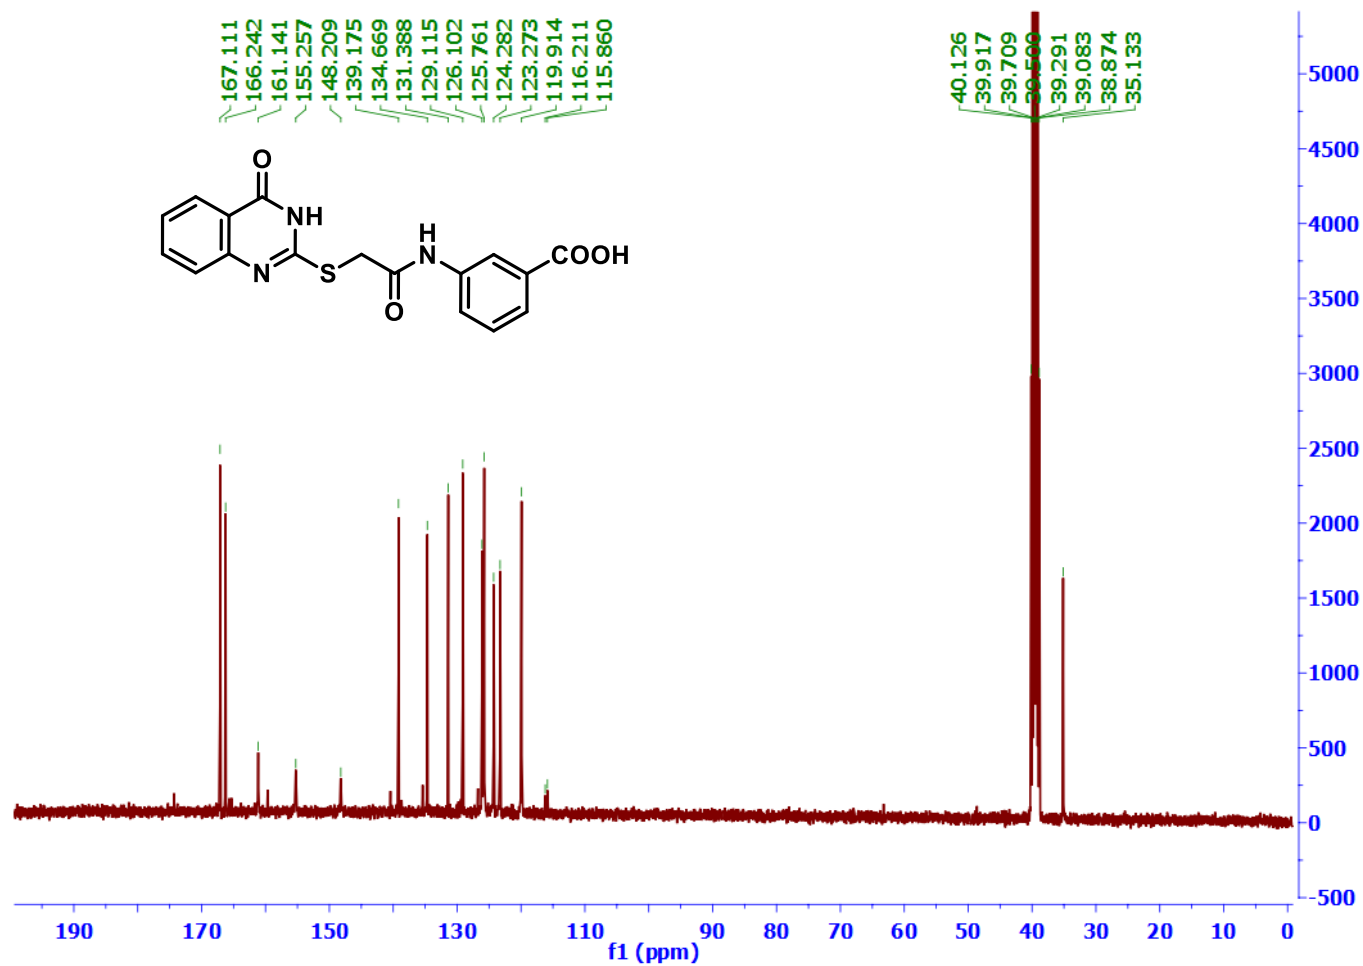

Fig. 4. <sup>13</sup>C (100 MHz) NMR spectrum of **11b** in DMSO-*d*<sub>6</sub>

4-(2-((4-Oxo-3,4-dihydroquinazolin-2-yl)thio)acetamido)benzoic acid (**11c**)

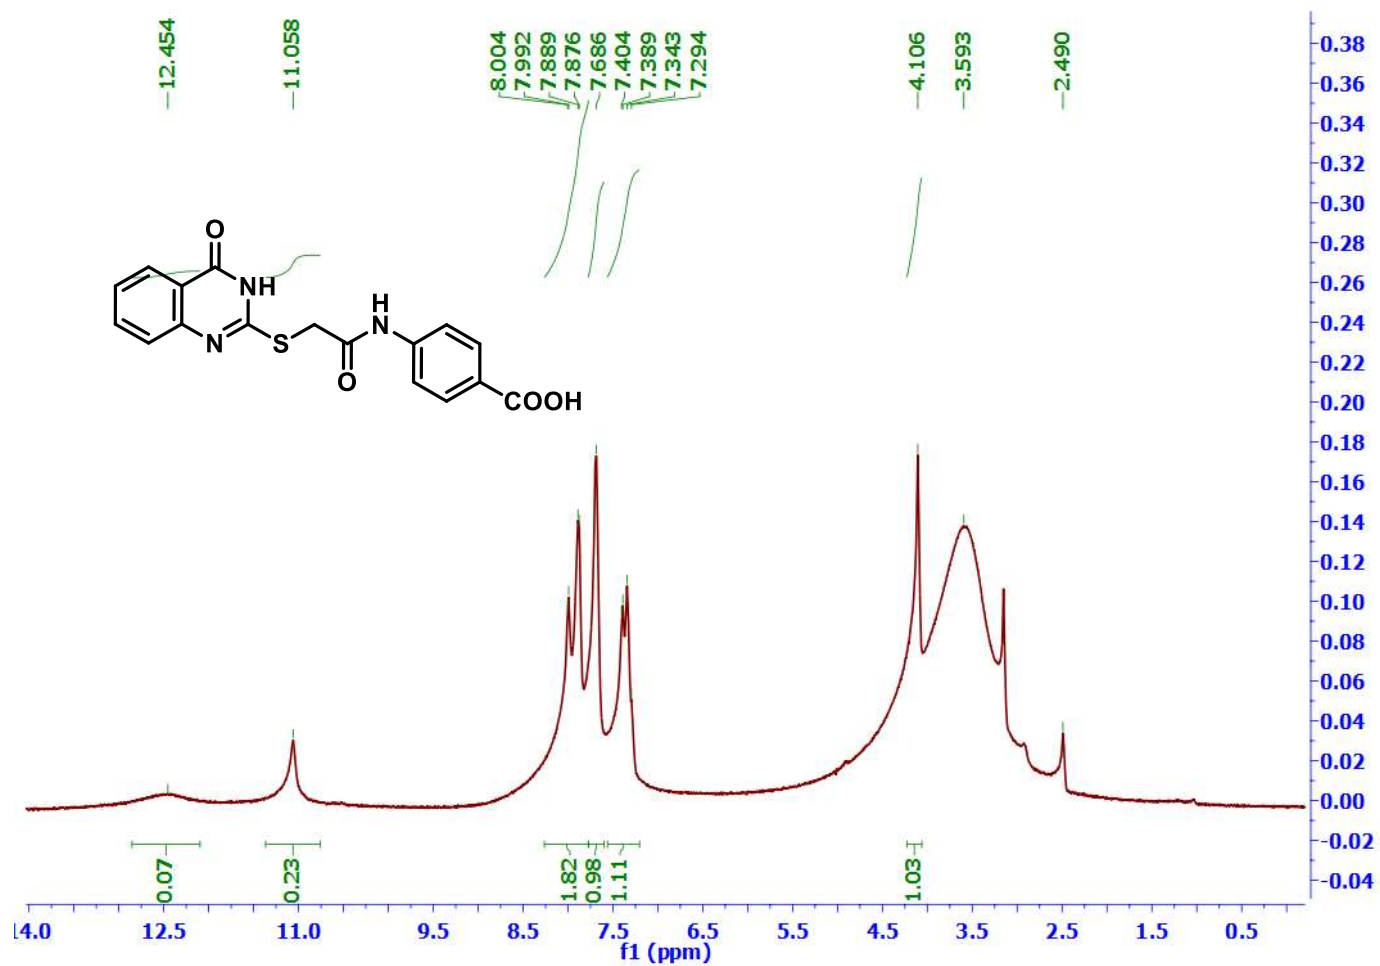

Fig. 5. <sup>1</sup>H (500 MHz) NMR spectrum of **11c** in DMSO-*d*<sub>6</sub>

2-(2-((4-Oxo-3,4,5,6,7,8-hexahydroquinazolin-2-yl)thio)acetamido)benzoic acid (**12a**)

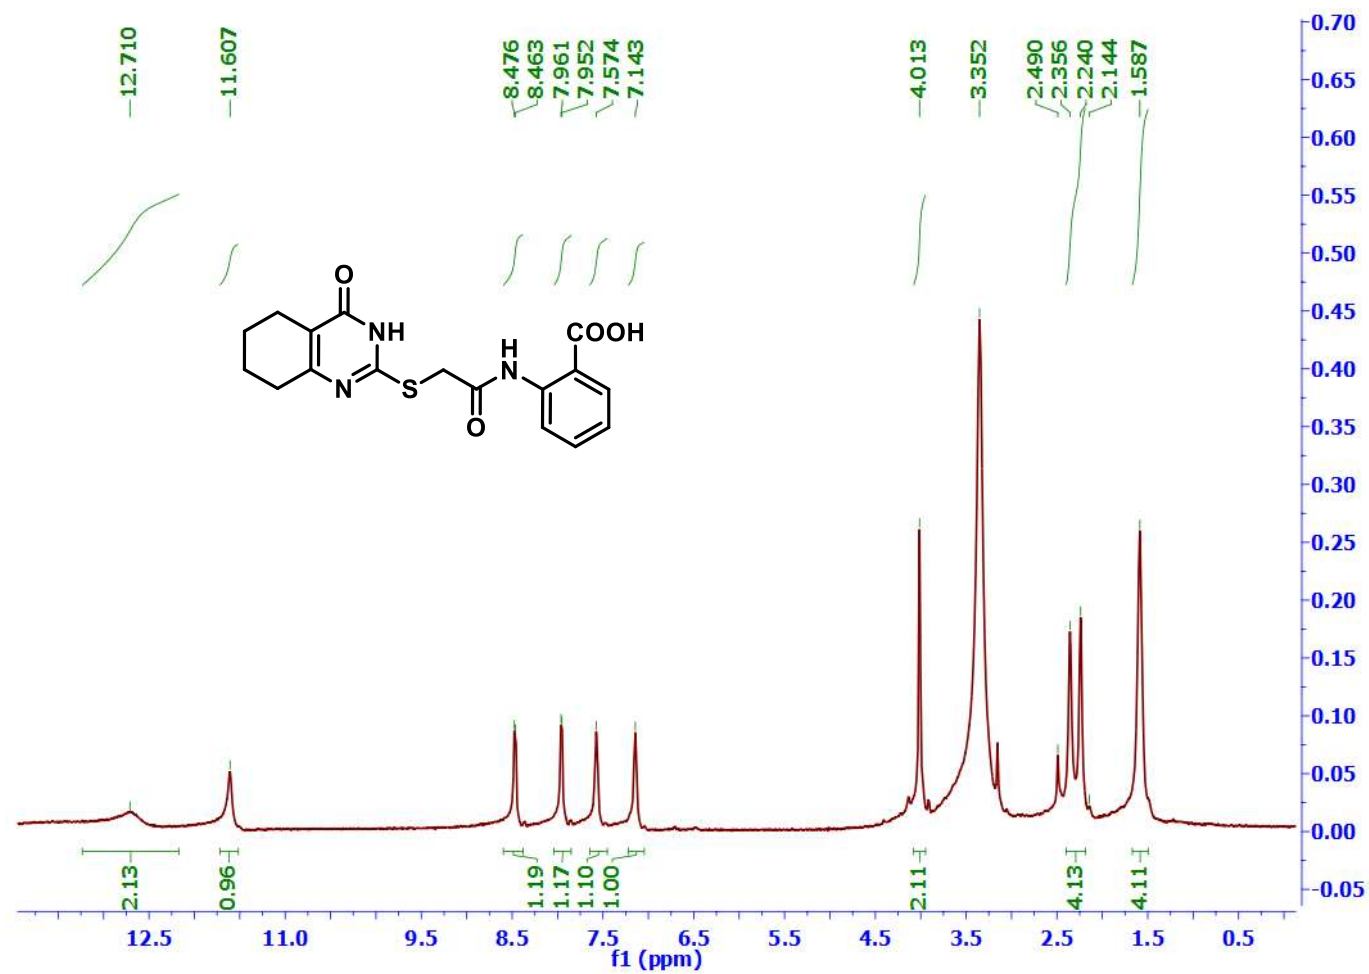

**Fig. 6.** <sup>1</sup>H (500 MHz) NMR spectrum of **12a** in DMSO-*d*<sub>6</sub>



2-(2-((4-Oxo-3,4,5,6,7,8-hexahydroquinazolin-2-yl)thio)acetamido)benzoic acid (**12a**)

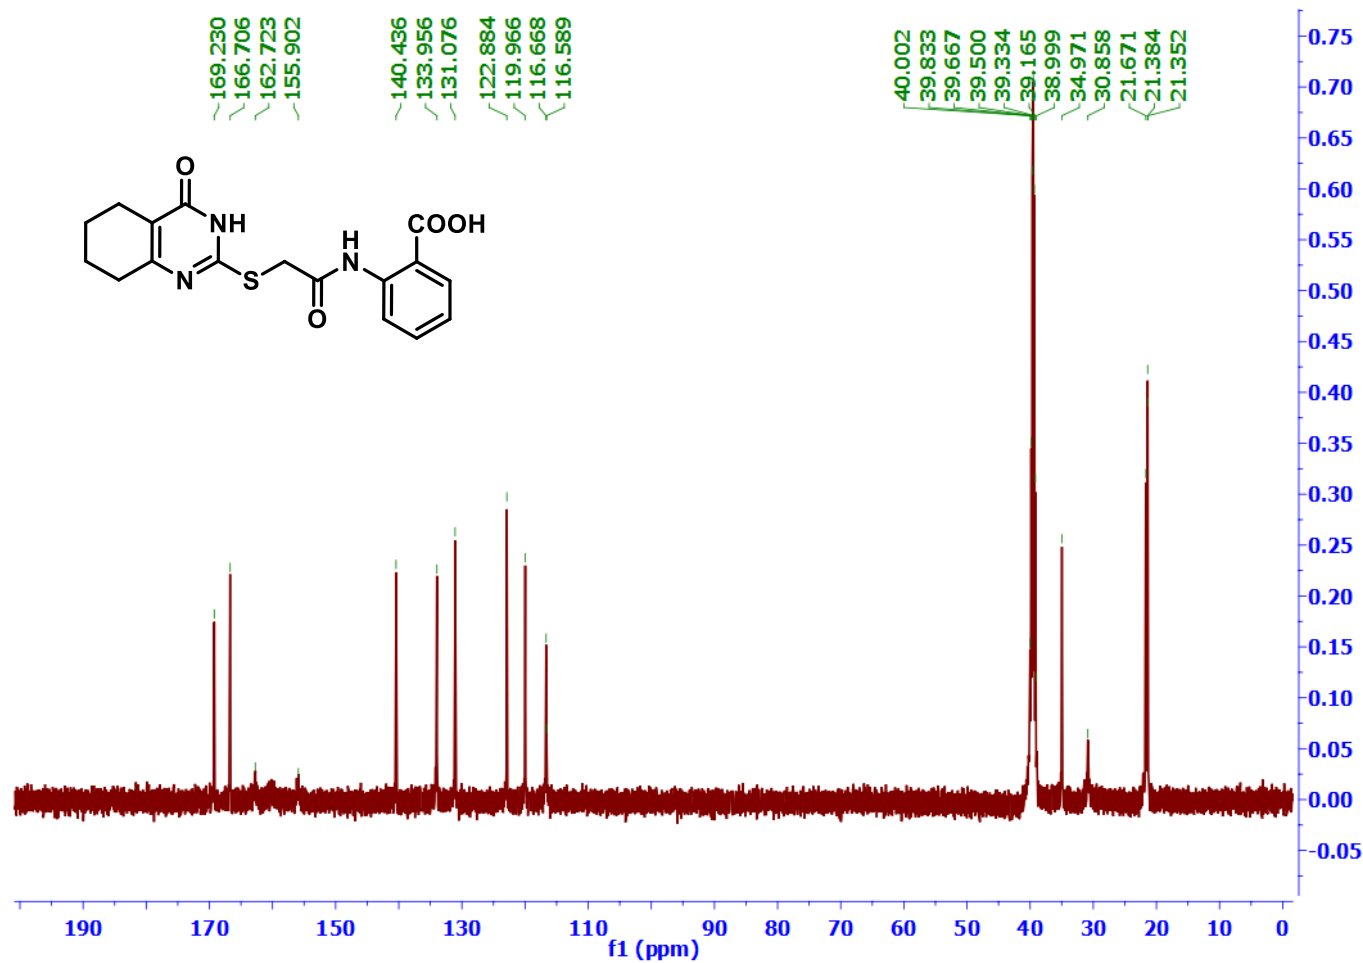

Fig. 7. <sup>13</sup>C (125 MHz) NMR spectrum of **12a** in DMSO-*d*<sub>6</sub>

3-(2-((4-Oxo-3,4,5,6,7,8-hexahydroquinazolin-2-yl)thio)acetamido)benzoic acid (**12b**)

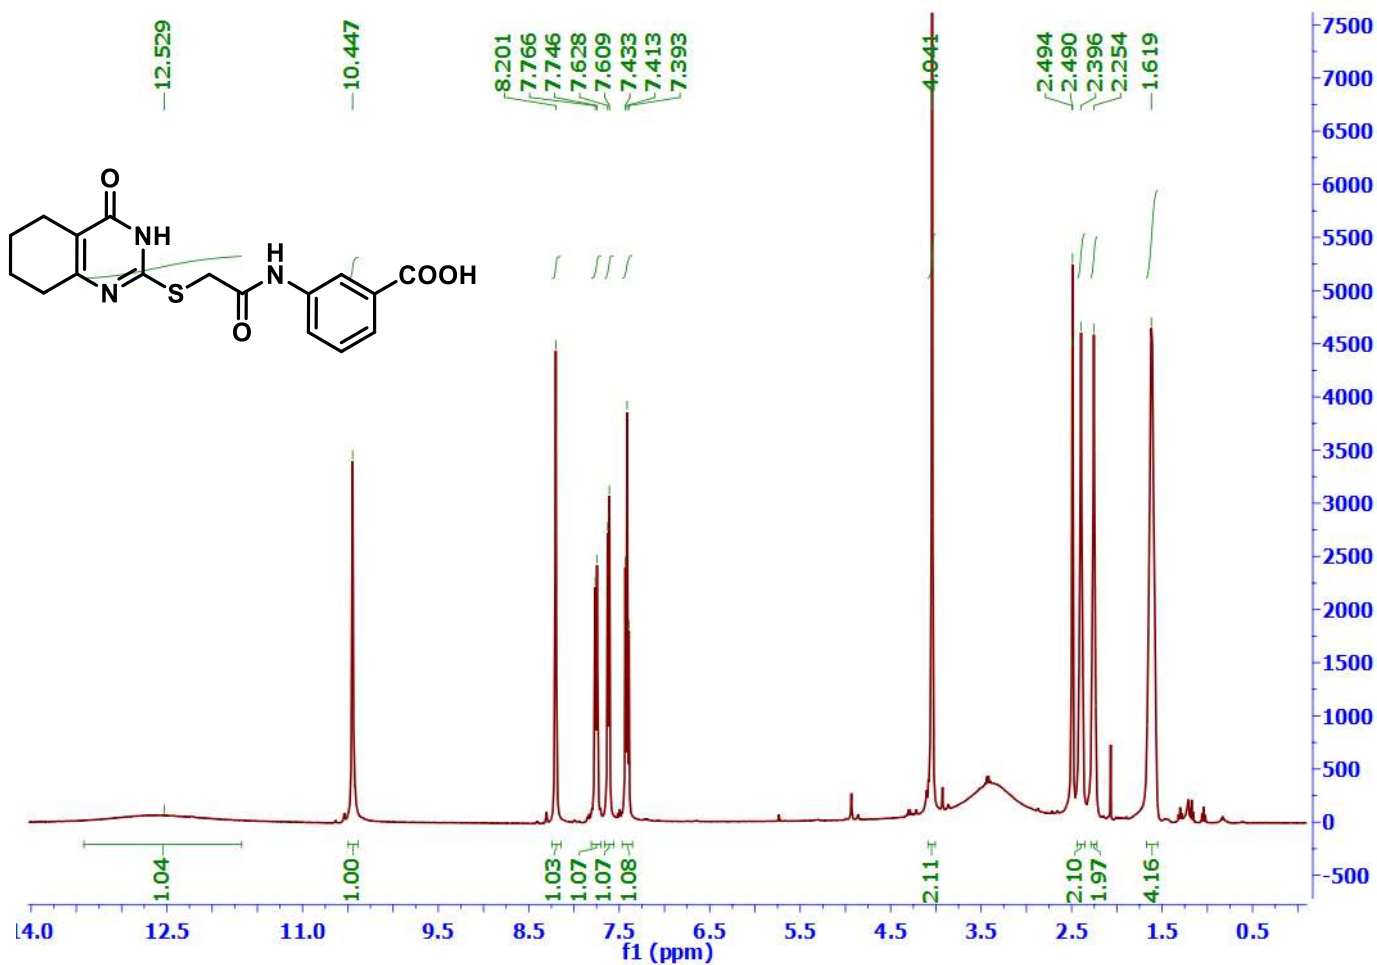

Fig. 8. <sup>1</sup>H (400 MHz) NMR spectrum of **12b** in DMSO-*d*<sub>6</sub>

3-(2-((4-Oxo-3,4,5,6,7,8-hexahydroquinazolin-2-yl)thio)acetamido)benzoic acid (**12b**)

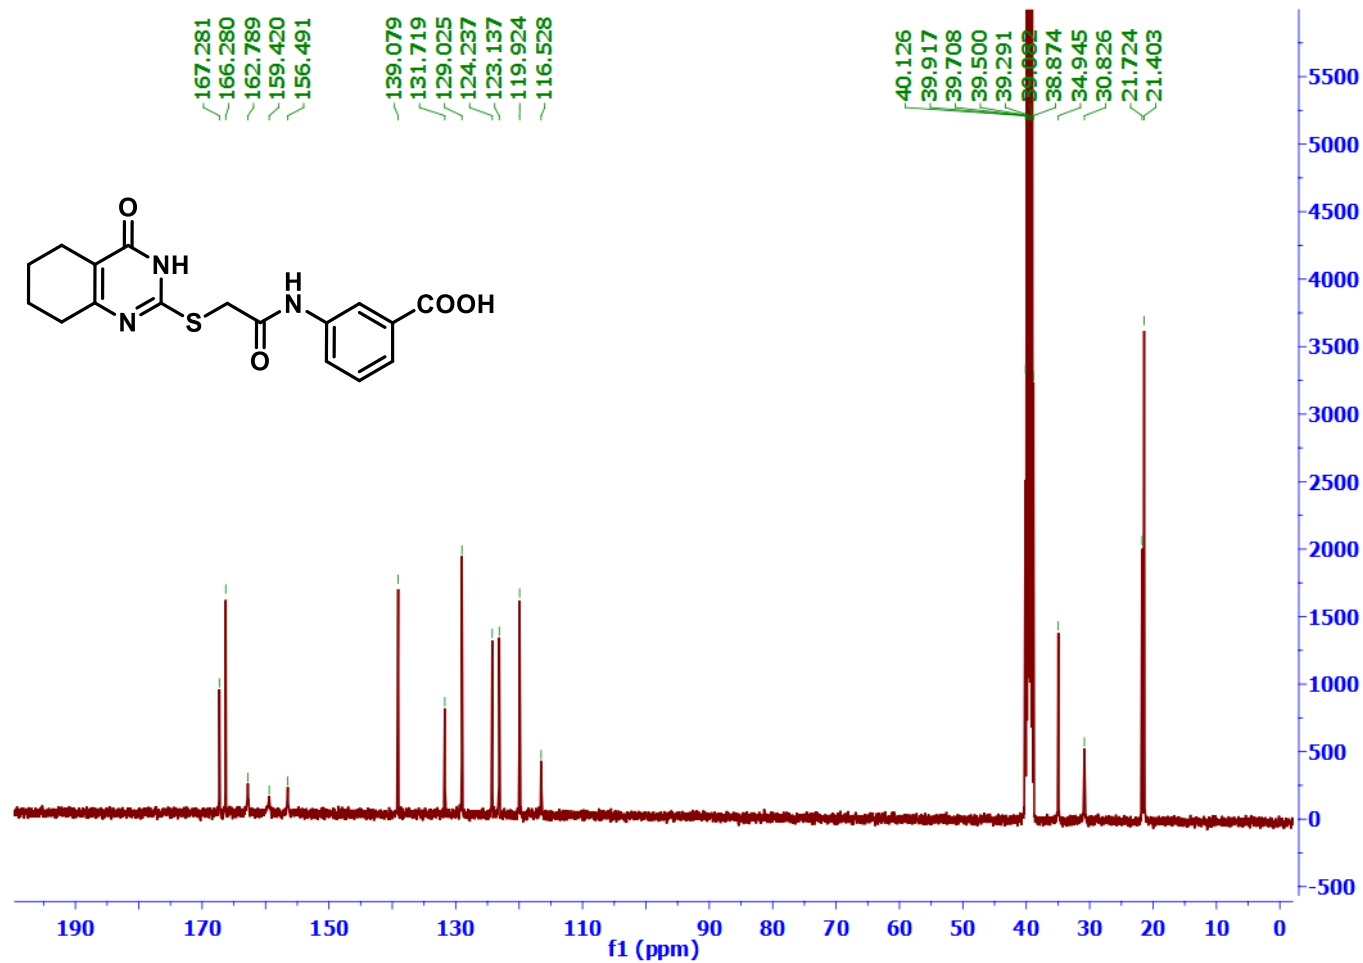

Fig. 9. <sup>13</sup>C (100 MHz) NMR spectrum of **12b** in DMSO-*d*<sub>6</sub>

4-(2-((4-Oxo-3,4,5,6,7,8-hexahydroquinazolin-2-yl)thio)acetamido)benzoic acid (**12c**)

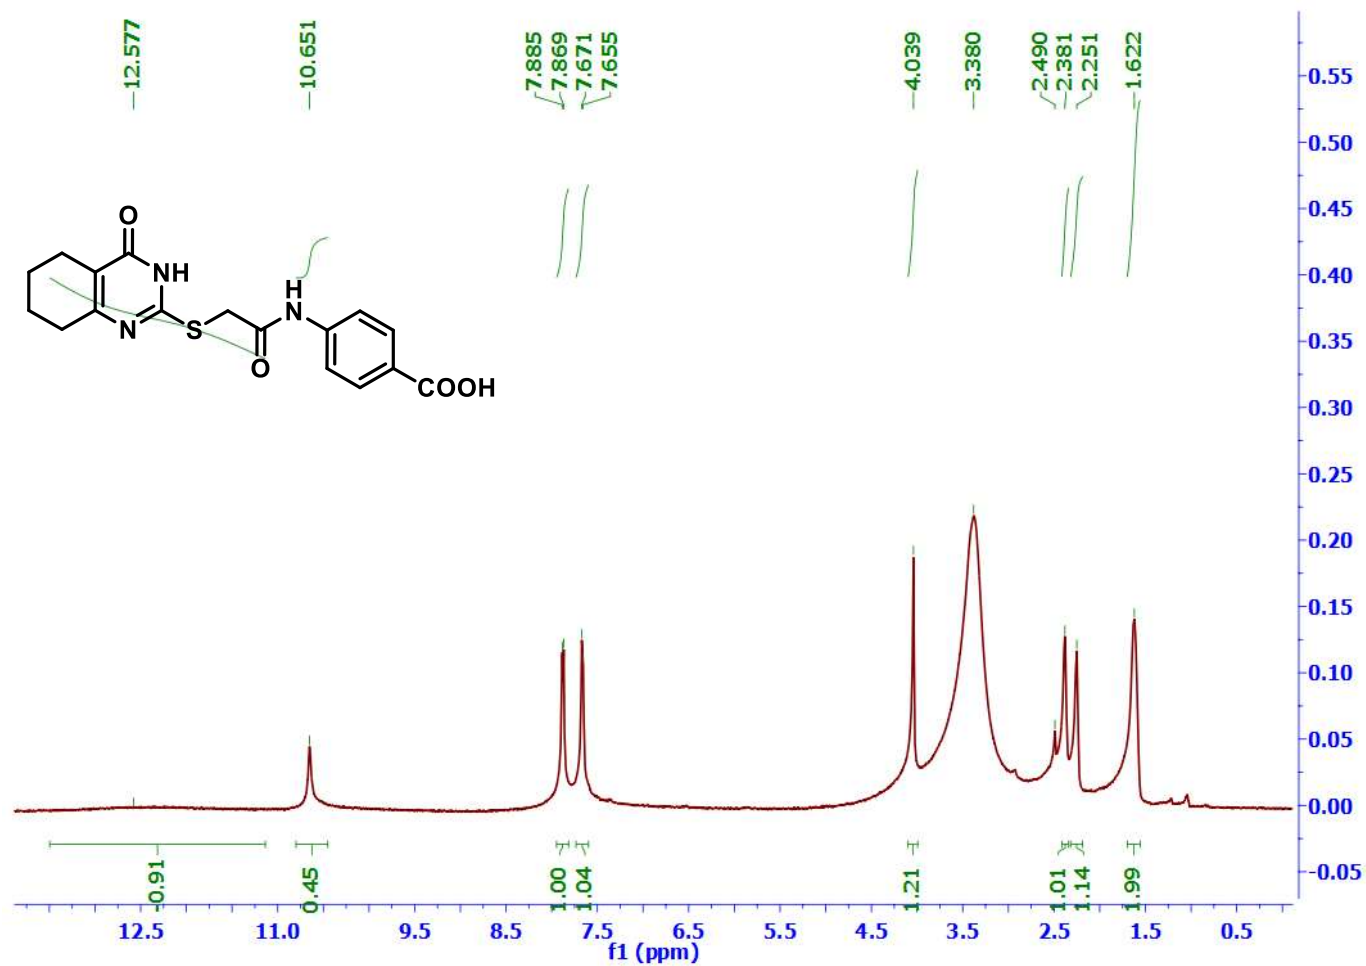

Fig. 10. <sup>1</sup>H (500 MHz) NMR spectrum of **12c** in DMSO-*d*<sub>6</sub>

4-(2-((4-Oxo-3,4,5,6,7,8-hexahydroquinazolin-2-yl)thio)acetamido)benzoic acid (**12c**)

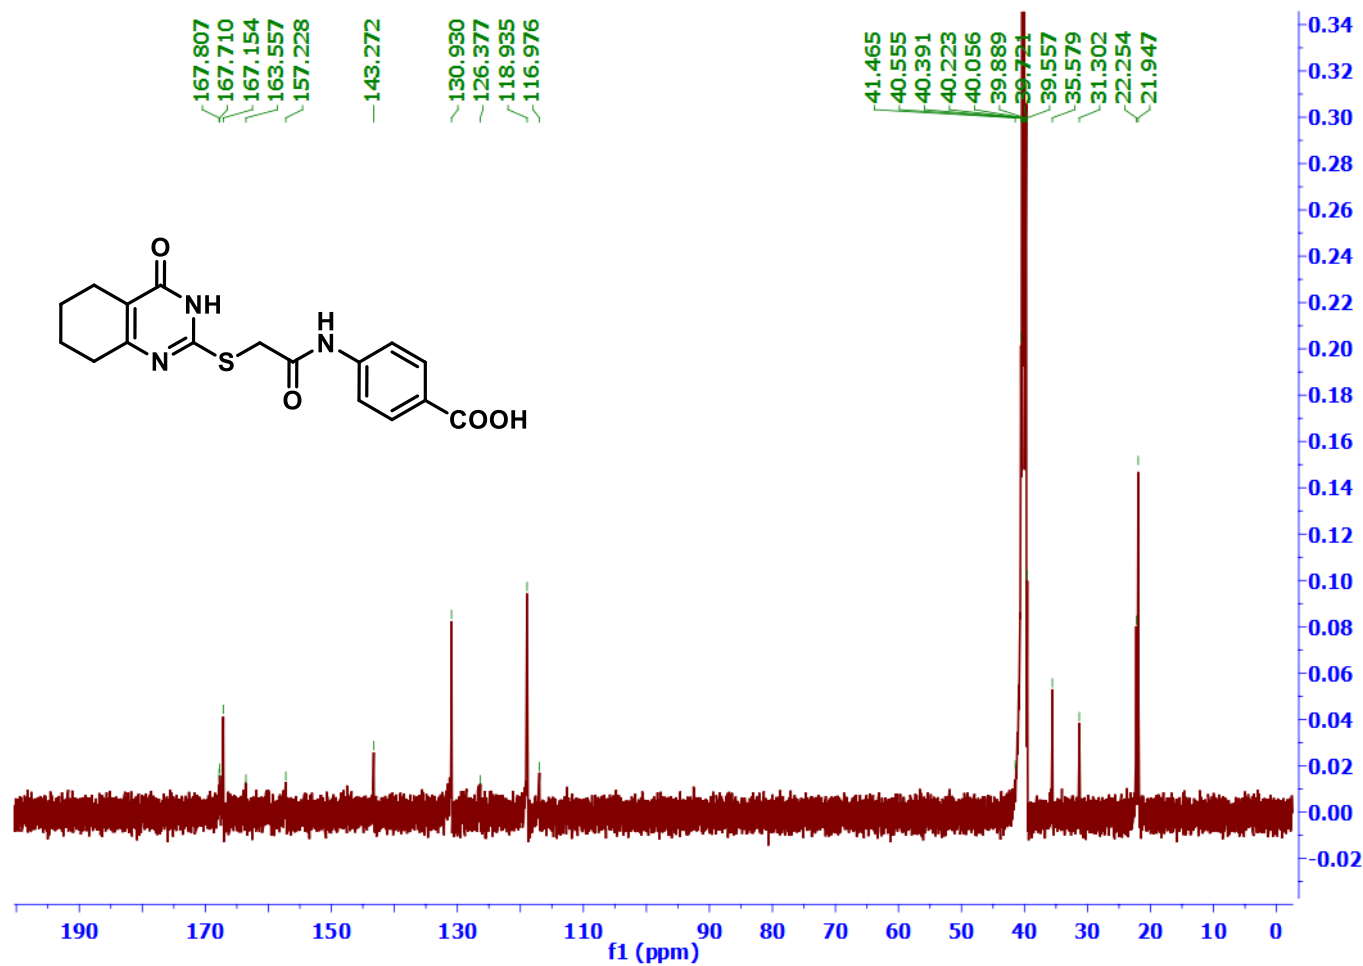

Fig. 11. <sup>13</sup>C (125 MHz) NMR spectrum of **12c** in DMSO-*d*<sub>6</sub>

*N'*-(2-((4-Oxo-3,4-dihydroquinazolin-2-yl)thio)acetyl)benzohydrazide (**17a**)

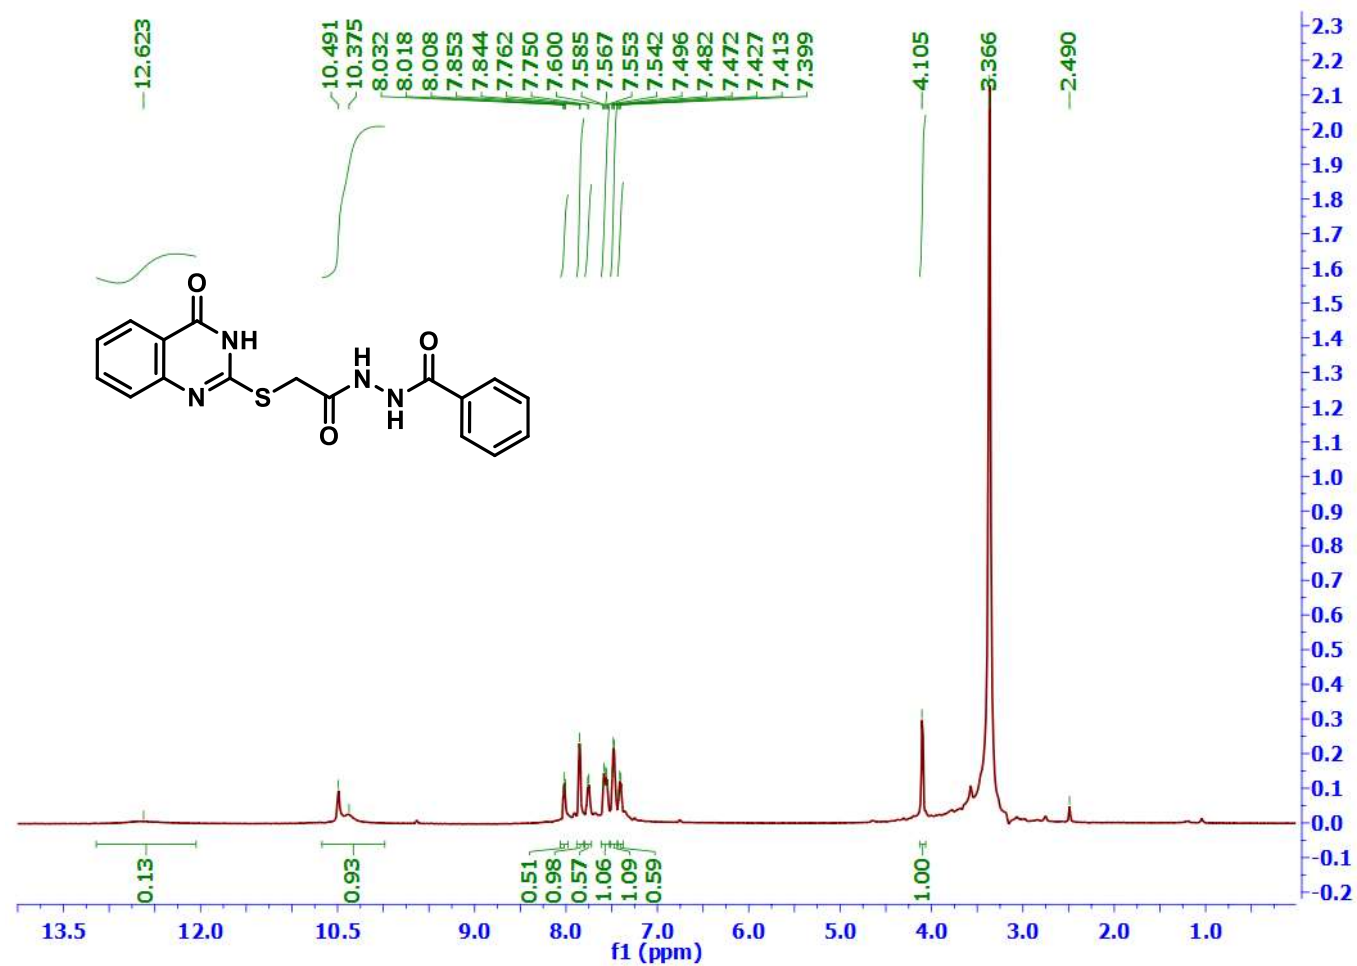

Fig. 12. <sup>1</sup>H (500 MHz) NMR spectrum of **17a** in DMSO-*d*<sub>6</sub>

4-Methyl-*N'*-(2-((4-oxo-3,4-dihydroquinazolin-2-yl)thio)acetyl)benzohydrazide (**17b**)

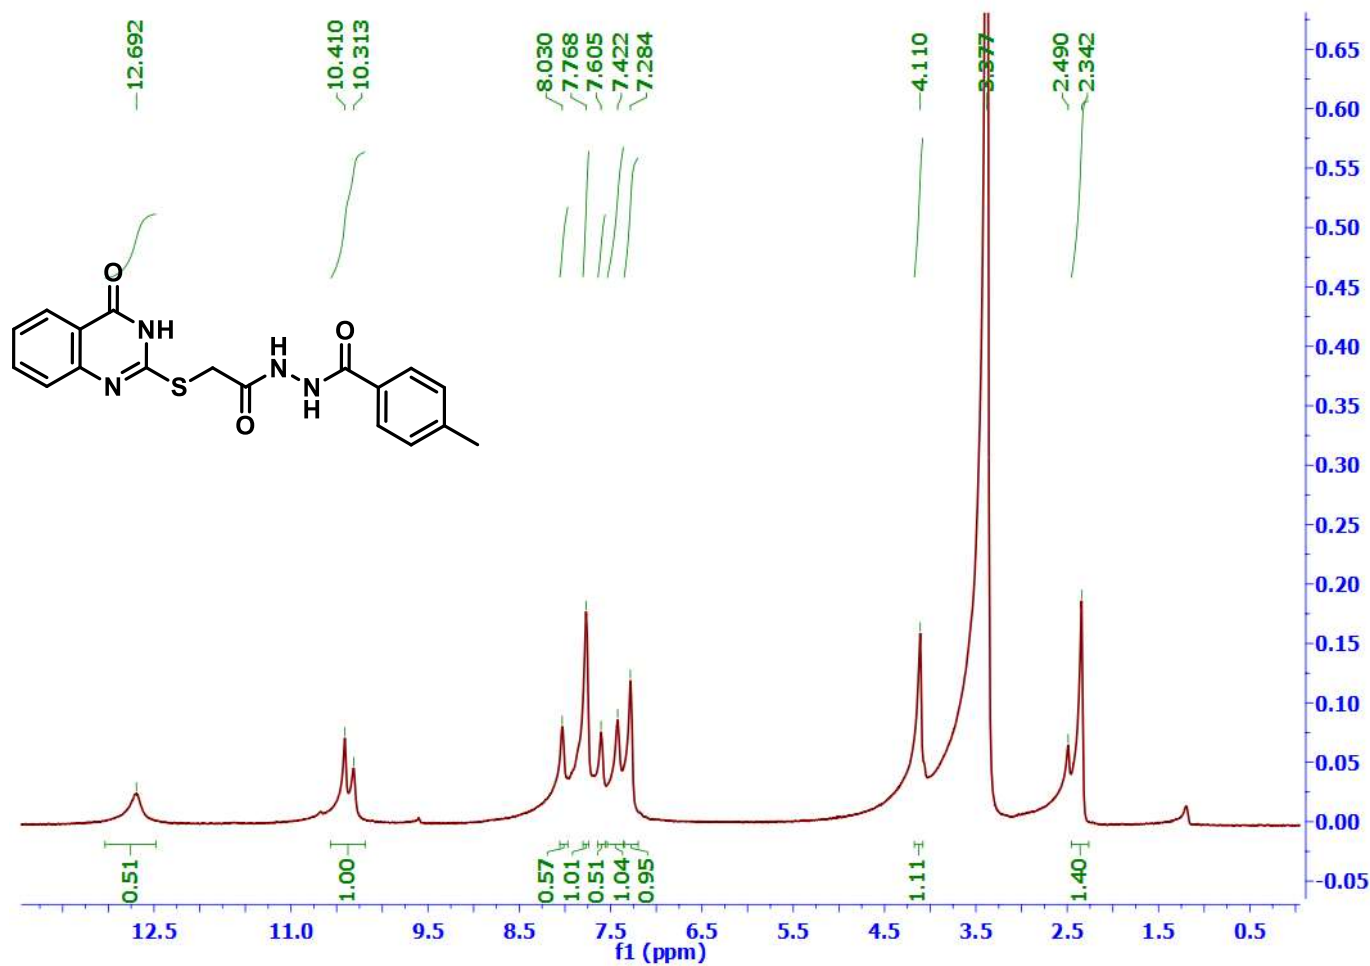

Fig. 13. <sup>1</sup>H (500 MHz) NMR spectrum of **17b** in DMSO-*d*<sub>6</sub>

4-Methyl-*N'*-(2-((4-oxo-3,4-dihydroquinazolin-2-yl)thio)acetyl)benzohydrazide (**17b**)

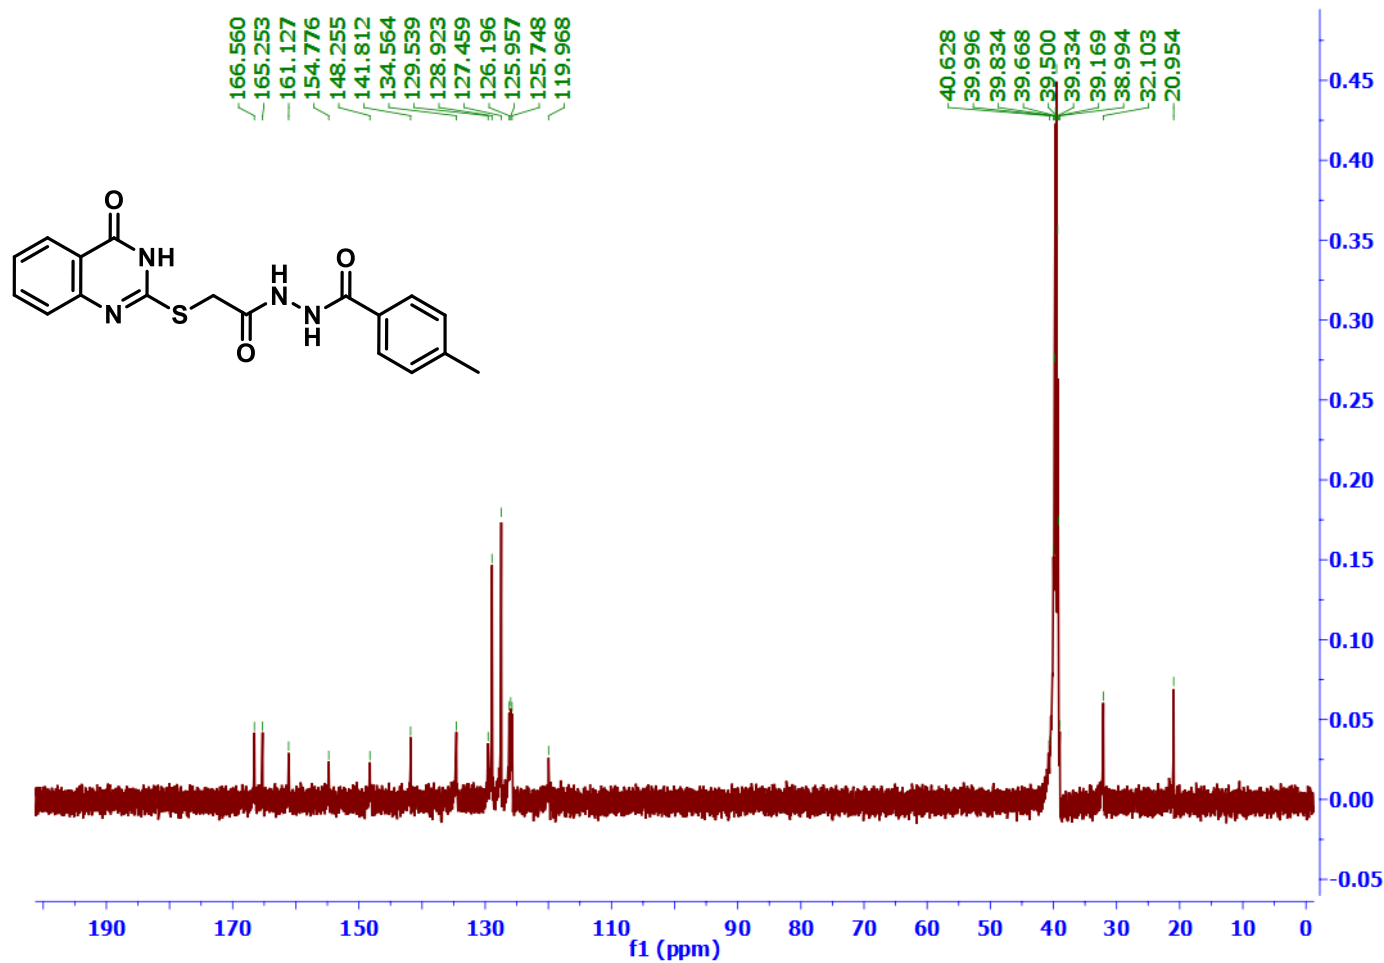

Fig. 14.  $^{13}\text{C}$  (125 MHz) NMR spectrum of **17b** in  $\text{DMSO-}d_6$



4-Nitro-*N'*-(2-((4-oxo-3,4-dihydroquinazolin-2-yl)thio)acetyl)benzohydrazide (**17c**)

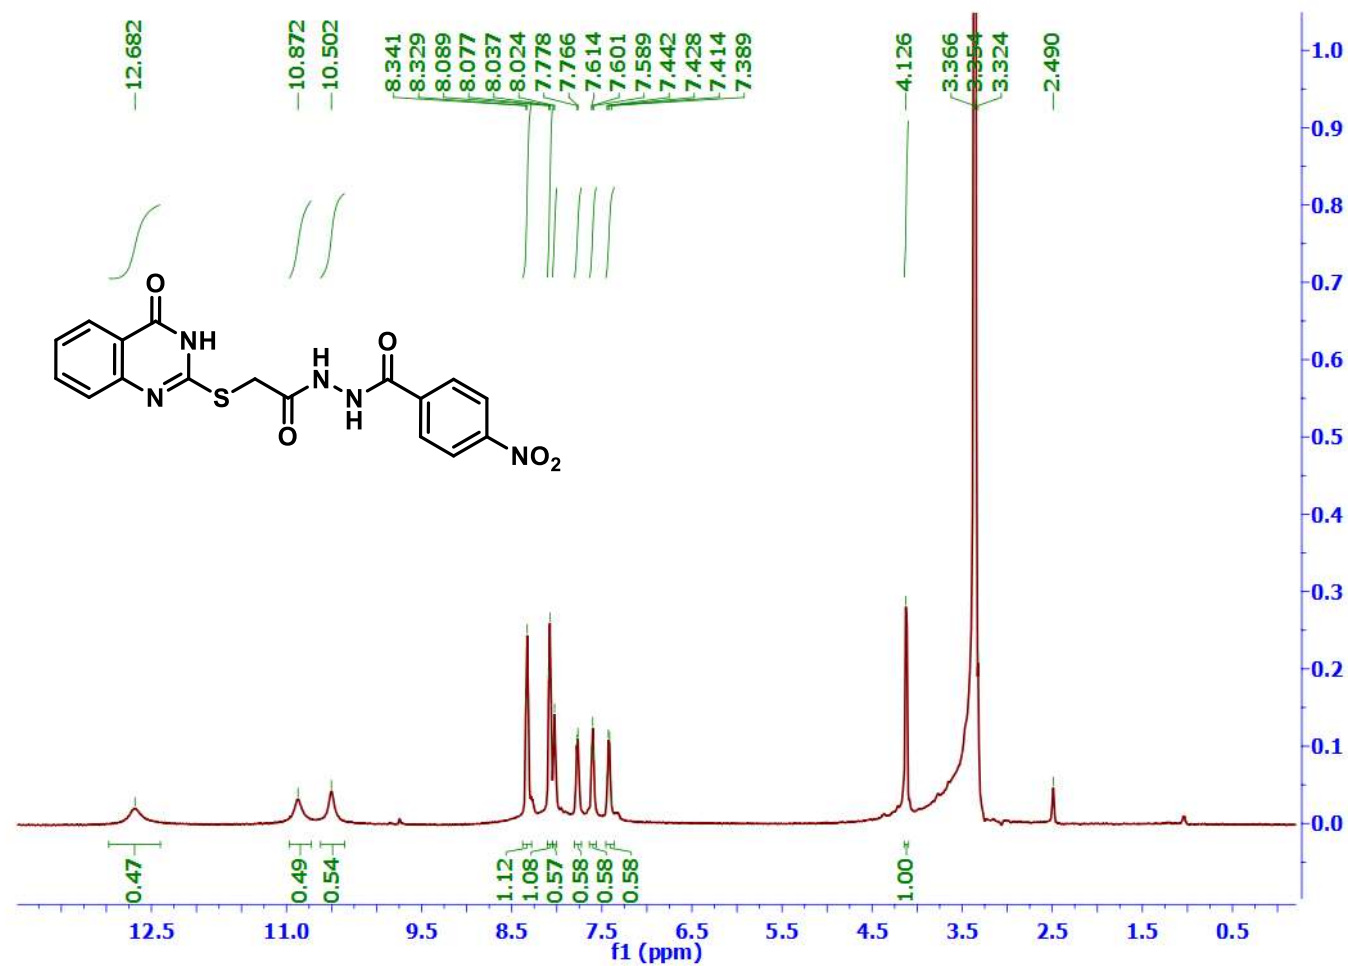

Fig. 15. <sup>1</sup>H (500 MHz) NMR spectrum of **17c** in DMSO-*d*<sub>6</sub>

4-Nitro-*N'*-(2-((4-oxo-3,4-dihydroquinazolin-2-yl)thio)acetyl)benzohydrazide (**17c**)

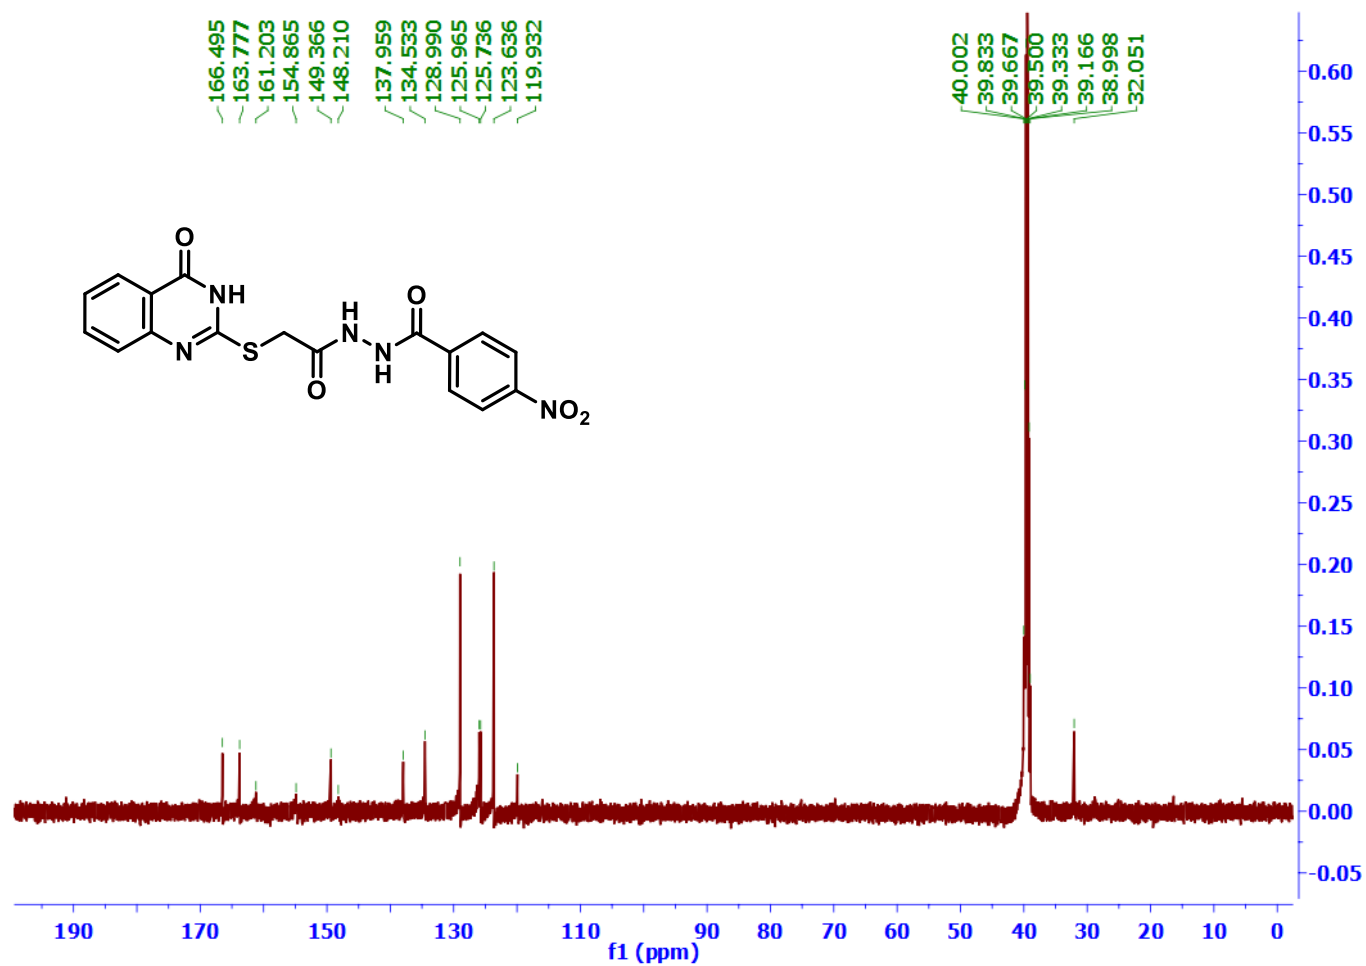

**Fig. 16.** <sup>13</sup>C (125 MHz) NMR spectrum of **17c** in DMSO-*d*<sub>6</sub>

2-Methoxy-*N'*-(2-((4-oxo-3,4-dihydroquinazolin-2-yl)thio)acetyl)benzohydrazide (**17d**)

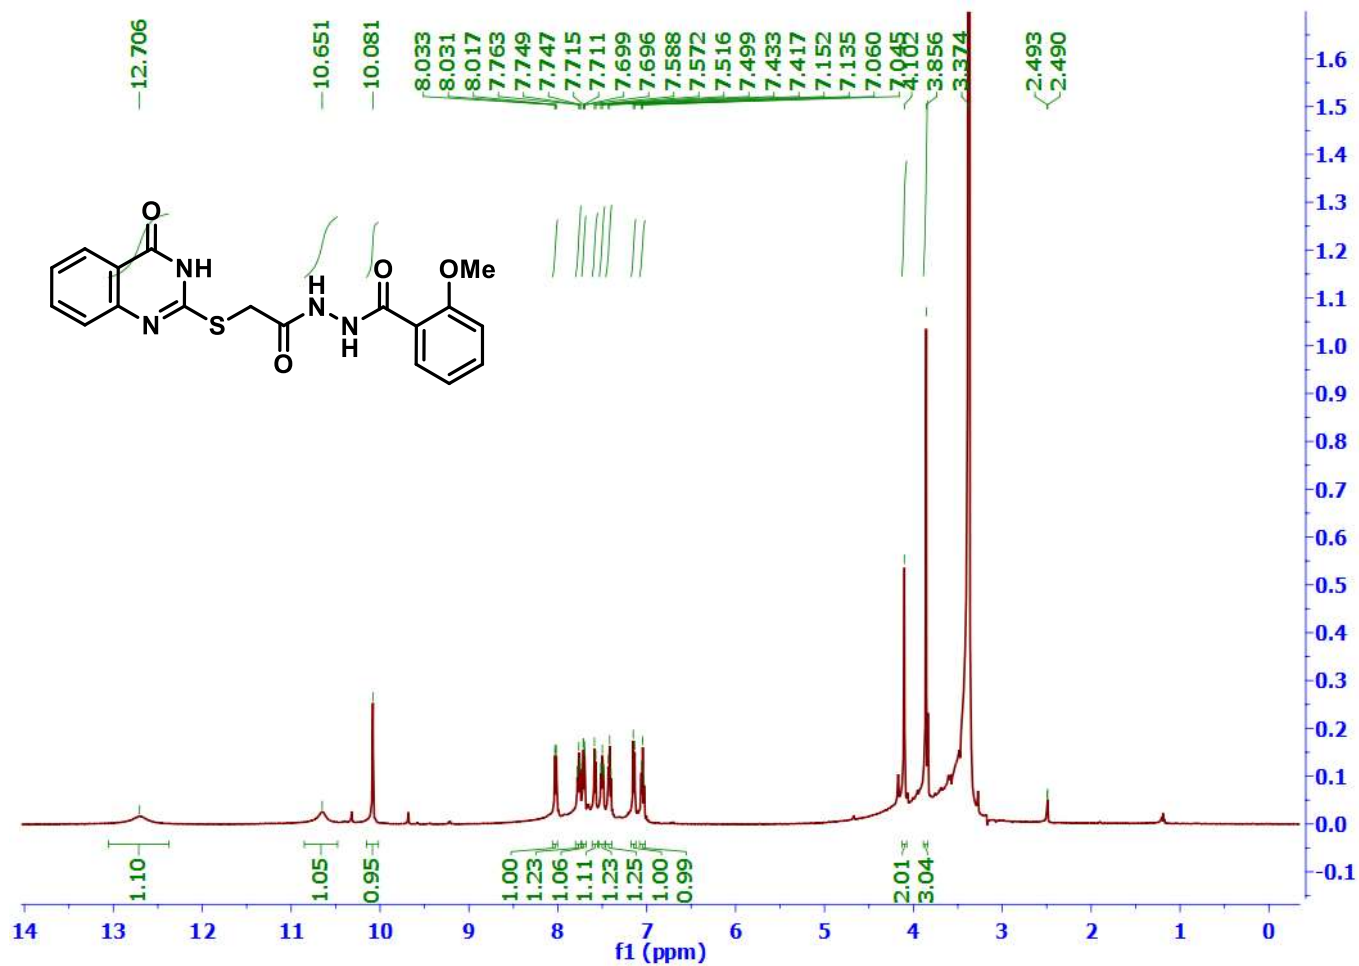

Fig. 17. <sup>1</sup>H (500 MHz) NMR spectrum of **17d** in DMSO-*d*<sub>6</sub>

2-Methoxy-*N'*-(2-((4-oxo-3,4-dihydroquinazolin-2-yl)thio)acetyl)benzohydrazide (**17d**)

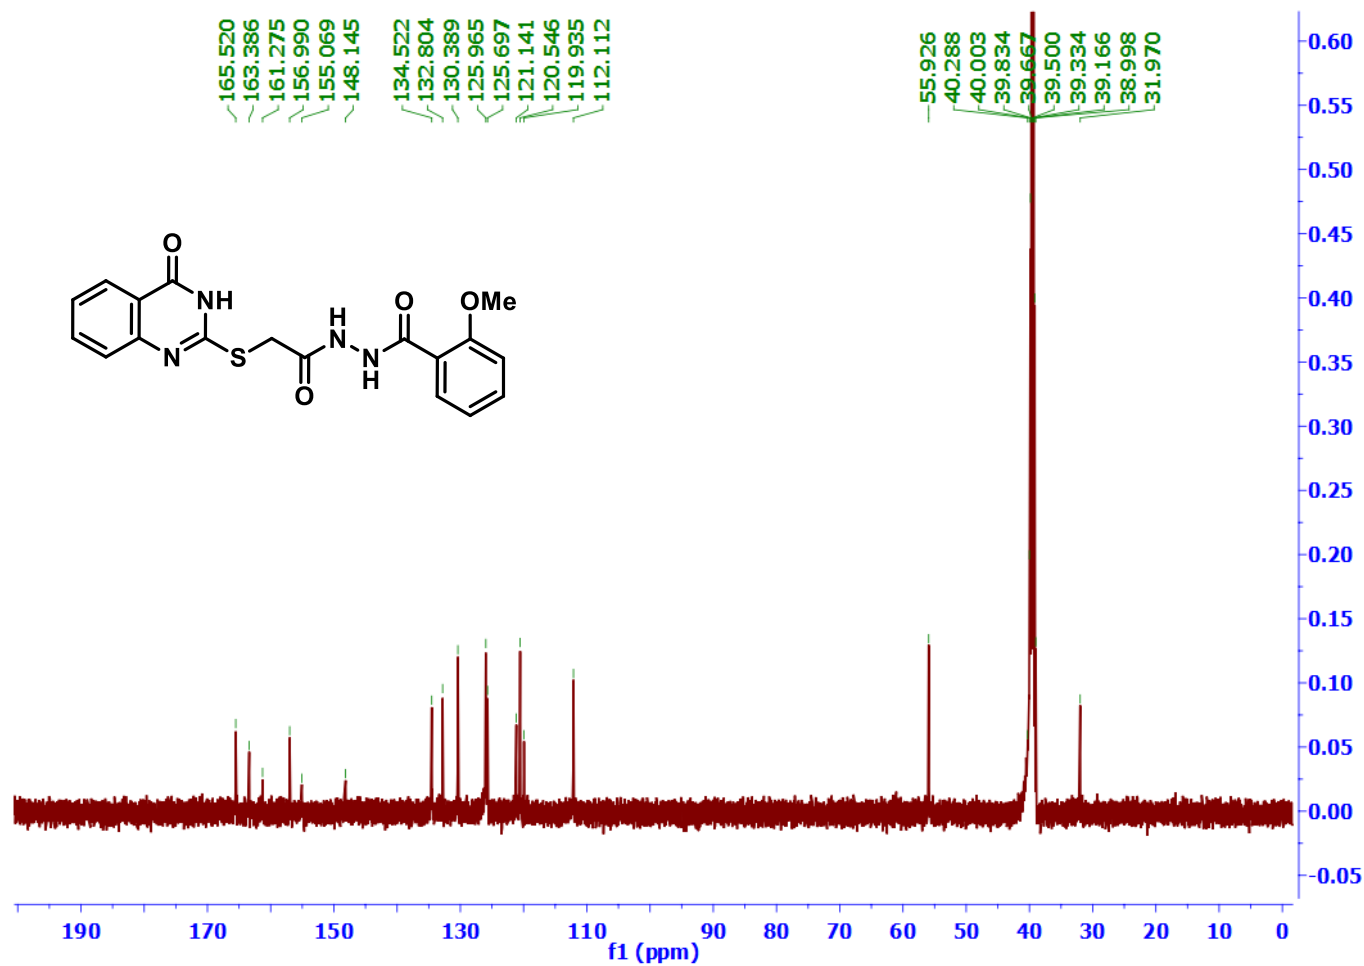

Fig. 18.  $^{13}\text{C}$  (125 MHz) NMR spectrum of **17d** in  $\text{DMSO-}d_6$

2-Chloro-*N'*-(2-((4-oxo-3,4-dihydroquinazolin-2-yl)thio)acetyl)benzohydrazide (**17e**)

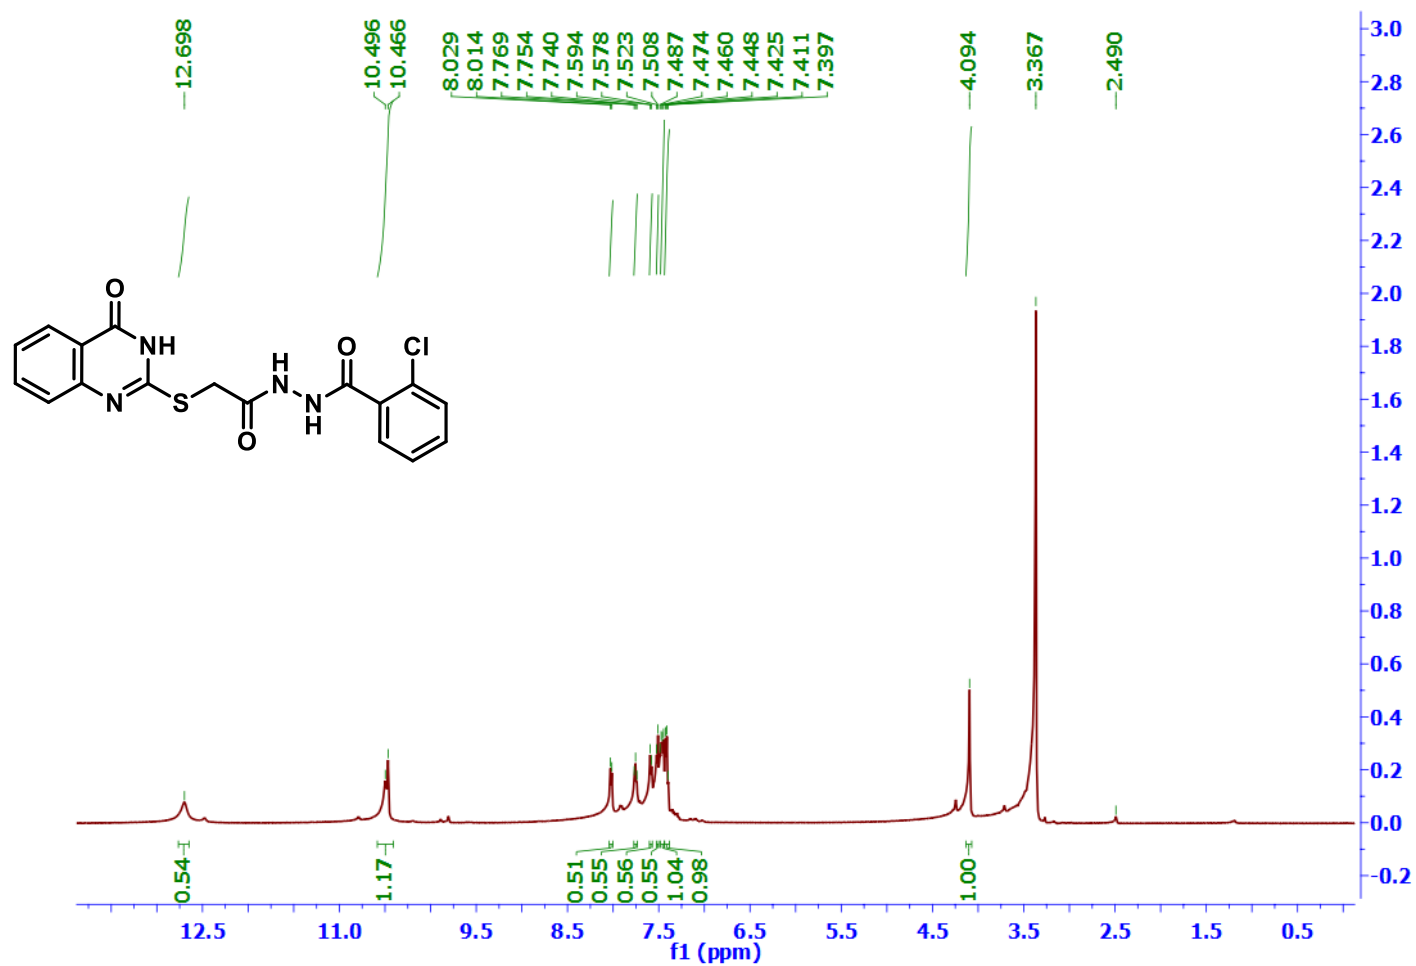

Fig. 19 <sup>1</sup>H (500 MHz) NMR spectrum of **17e** in DMSO-*d*<sub>6</sub>

2-Chloro-*N'*-(2-((4-oxo-3,4-dihydroquinazolin-2-yl)thio)acetyl)benzohydrazide (**17e**)

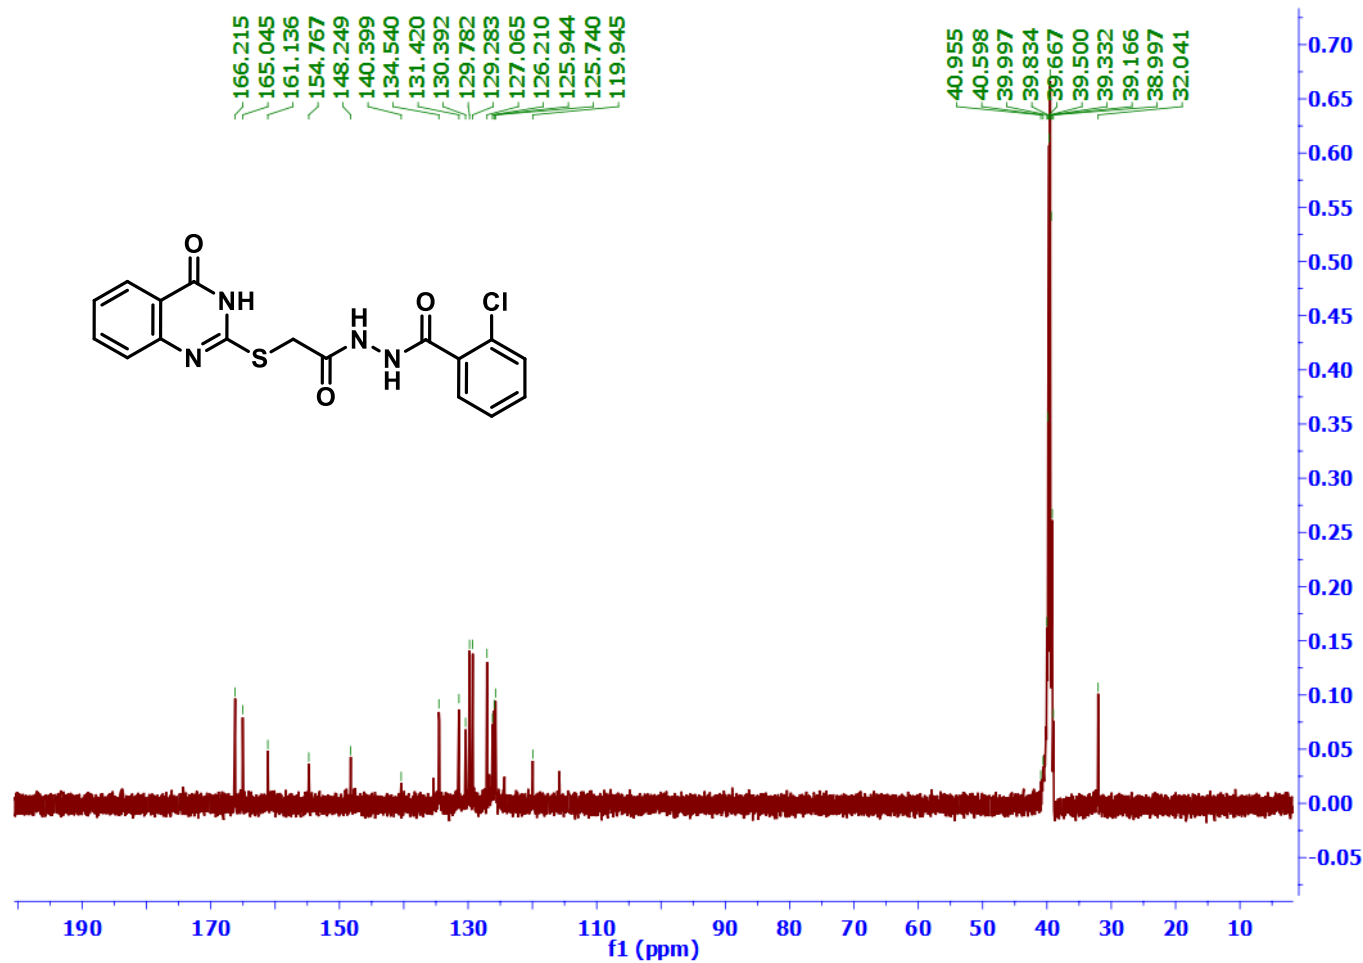

Fig. 20 <sup>13</sup>C (125 MHz) NMR spectrum of **17e** in DMSO-*d*<sub>6</sub>

4-Chloro-*N'*-(2-((4-oxo-3,4-dihydroquinazolin-2-yl)thio)acetyl)benzohydrazide (**17f**)

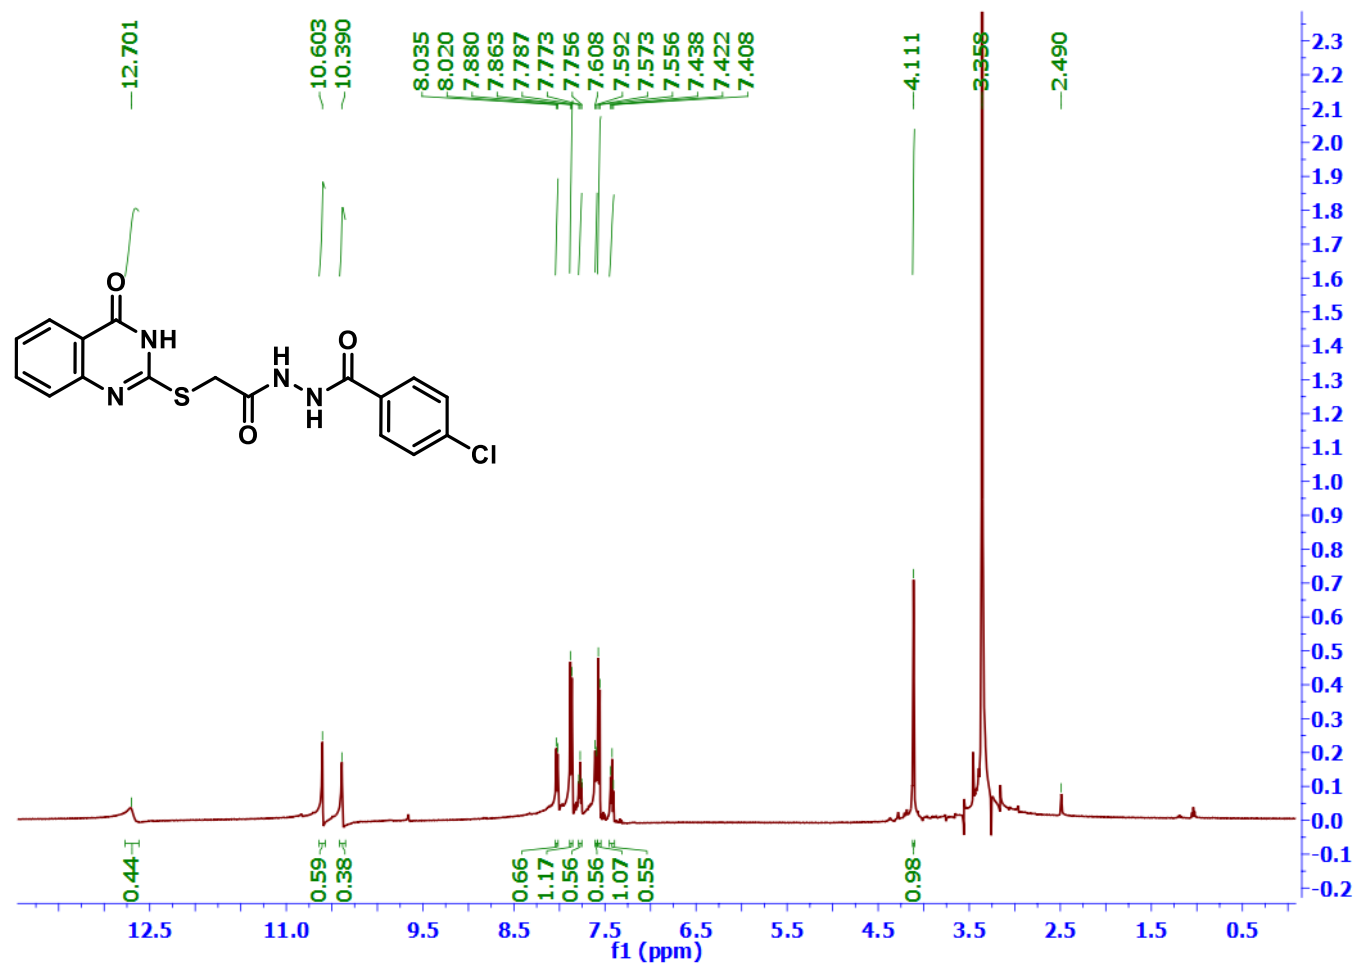

Fig. 21 <sup>1</sup>H (500 MHz) NMR spectrum of **17f** in DMSO-*d*<sub>6</sub>

4-Chloro-*N'*-(2-((4-oxo-3,4-dihydroquinazolin-2-yl)thio)acetyl)benzohydrazide (**17f**)

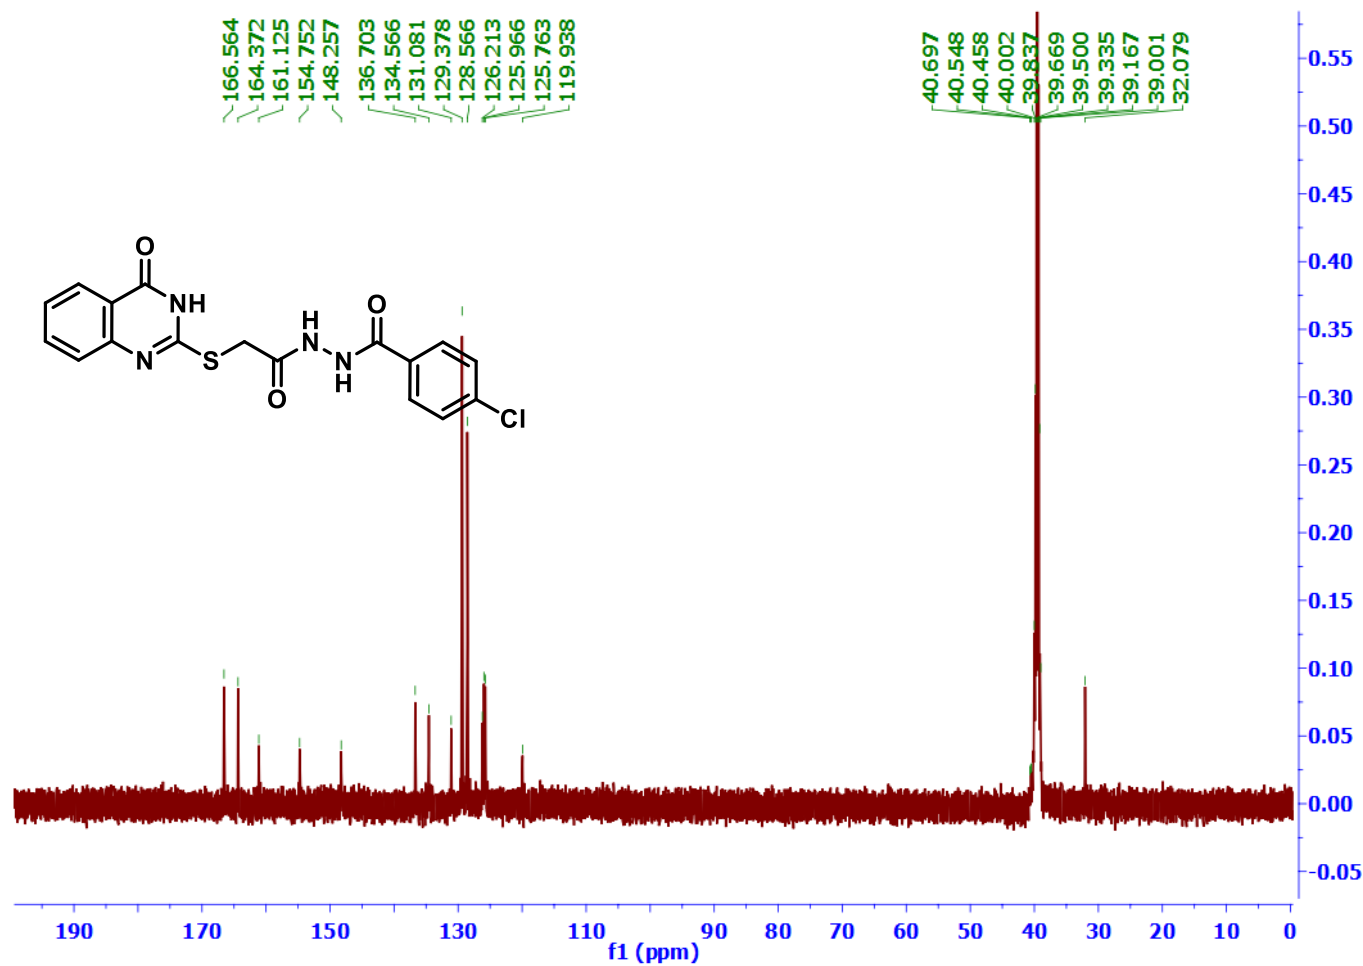

Fig. 22. <sup>13</sup>C (125 MHz) NMR spectrum of **17f** in DMSO-*d*<sub>6</sub>



2-Bromo-*N'*-(2-((4-oxo-3,4-dihydroquinazolin-2-yl)thio)acetyl)benzohydrazide (**17g**)

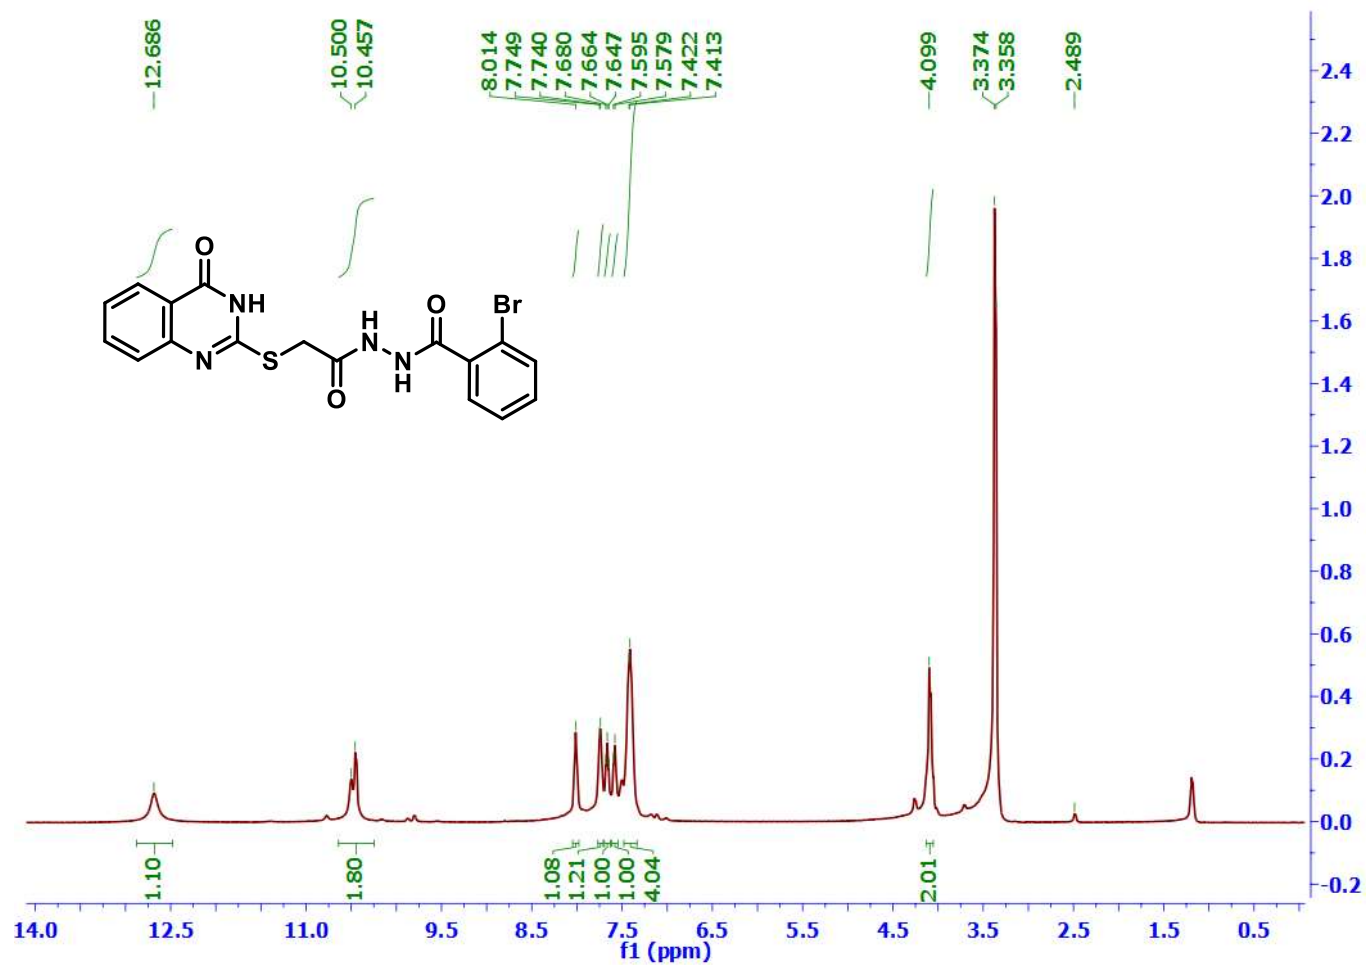

**Fig. 23.** <sup>1</sup>H (500 MHz) NMR spectrum of **17g** in DMSO-*d*<sub>6</sub>

2-Bromo-*N'*-(2-((4-oxo-3,4-dihydroquinazolin-2-yl)thio)acetyl)benzohydrazide (**17g**)

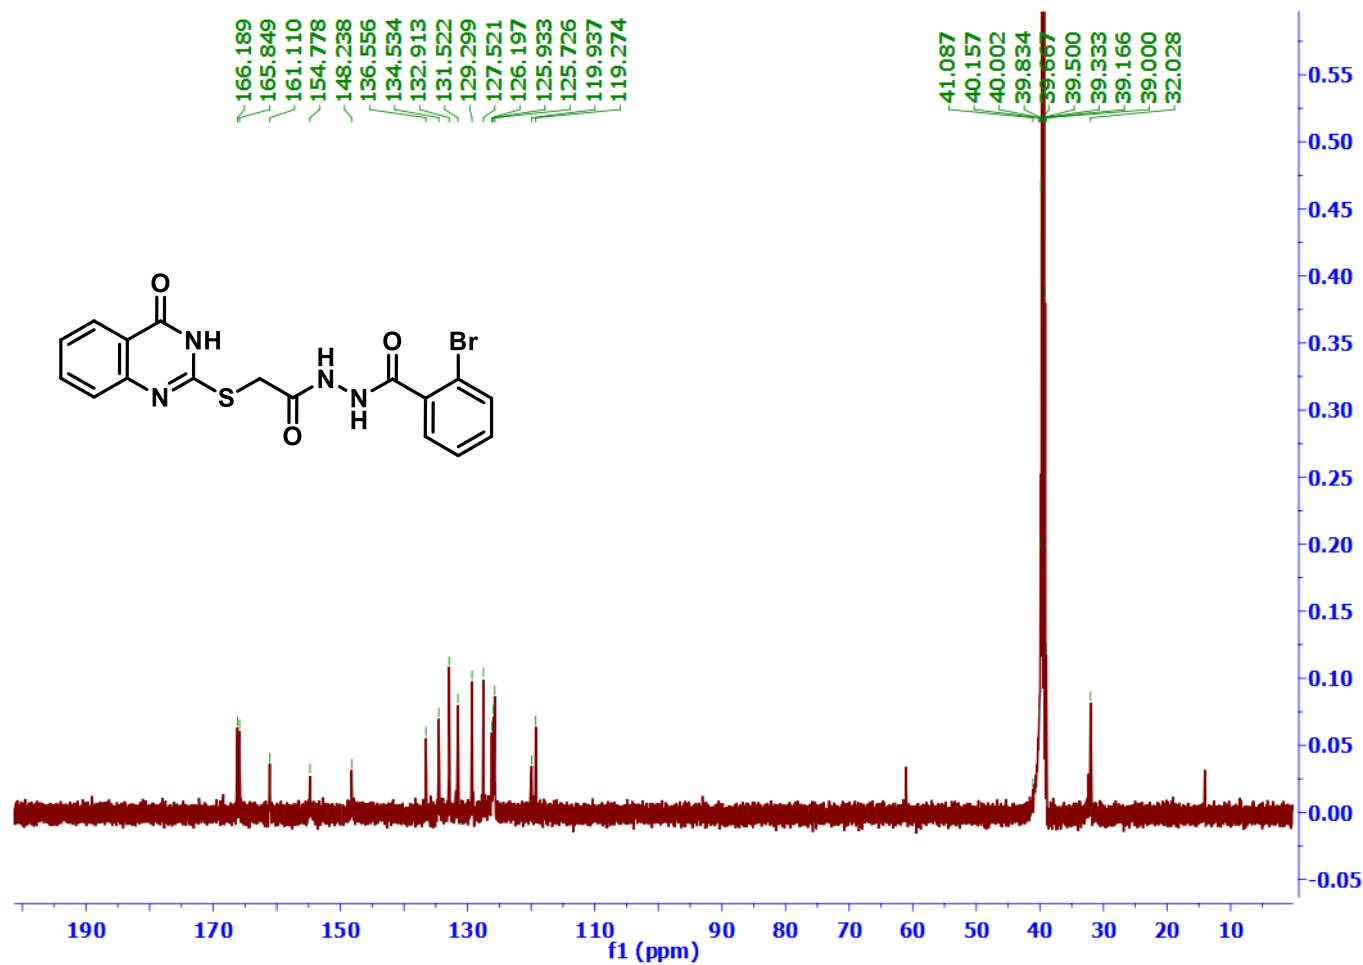

**Fig. 24.** <sup>13</sup>C (125 MHz) NMR spectrum of **17g** in DMSO-*d*<sub>6</sub>

*N'*-(2-((4-oxo-3,4,5,6,7,8-hexahydroquinazolin-2-yl)thio)acetyl)benzohydrazide (**18a**)

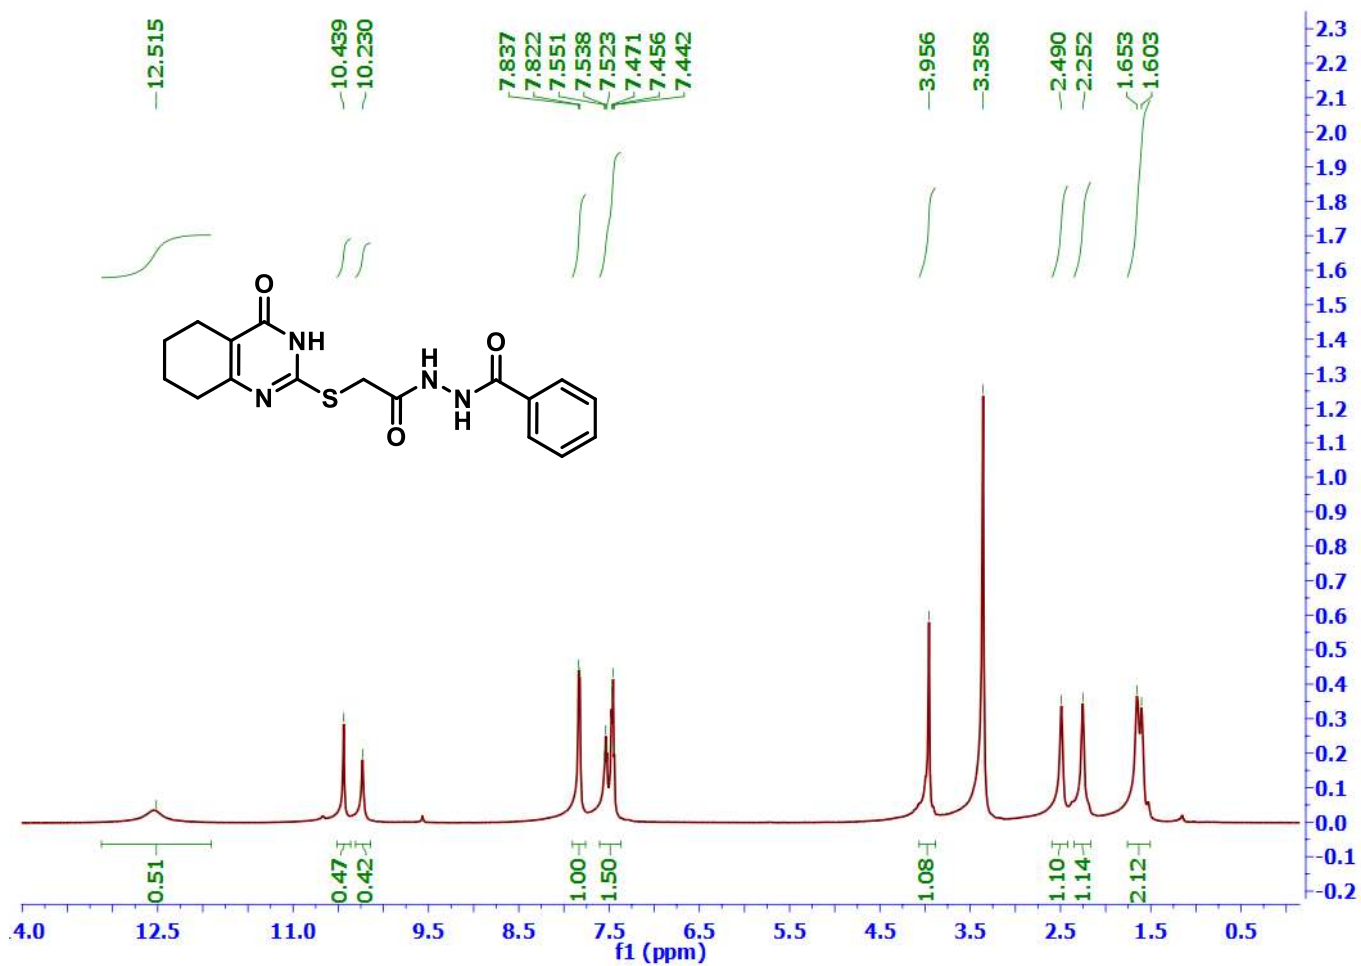

Fig. 25.  $^{13}\text{C}$  (125 MHz) NMR spectrum of **18a** in  $\text{DMSO-}d_6$

*N'*-(2-((4-oxo-3,4,5,6,7,8-hexahydroquinazolin-2-yl)thio)acetyl)benzohydrazide (**18a**)

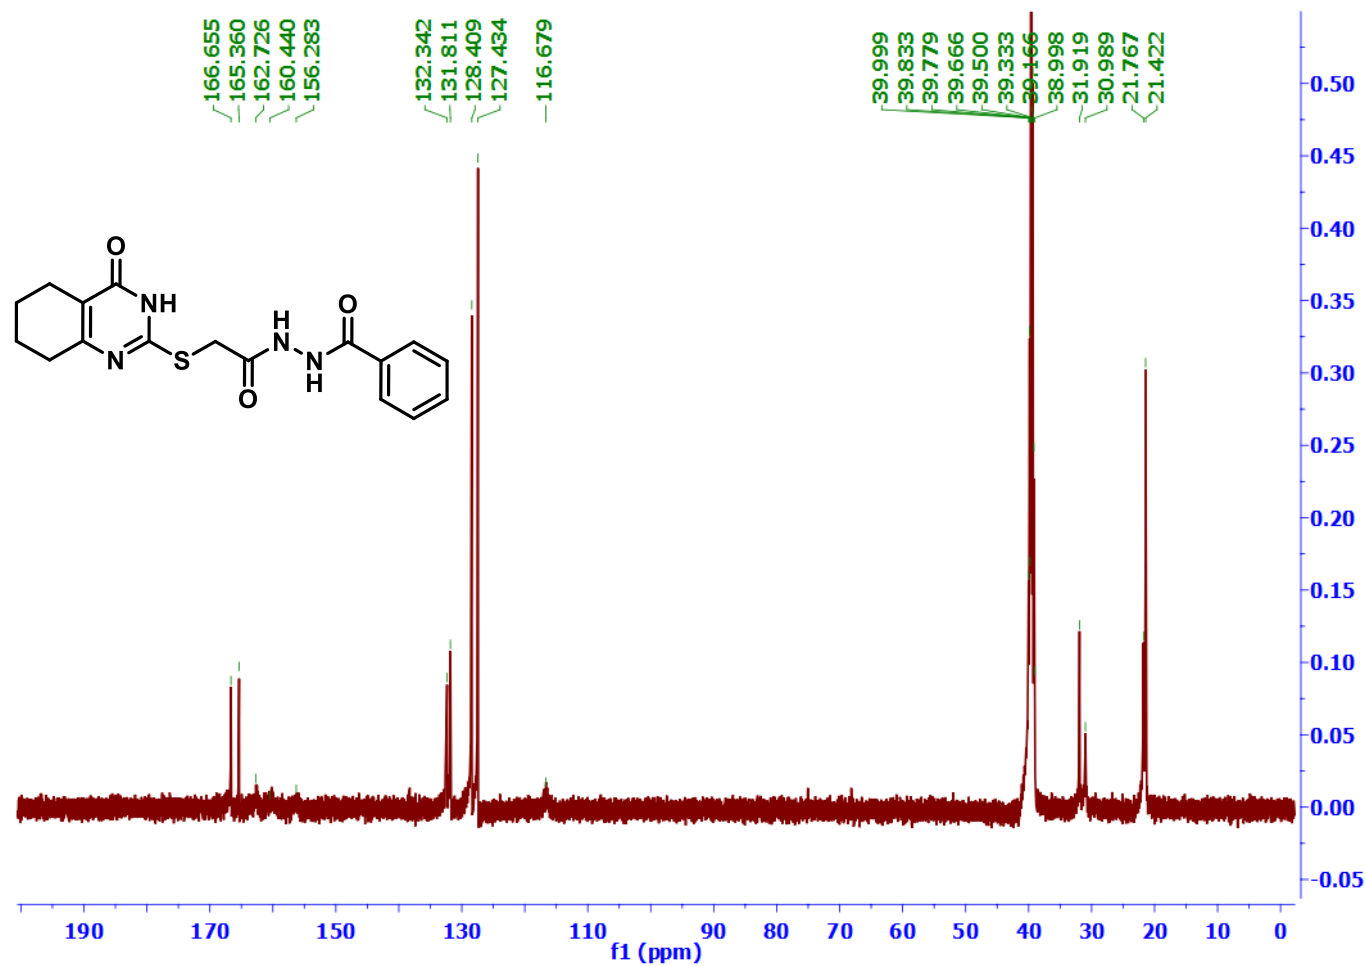

Fig. 26.  $^{13}\text{C}$  (125 MHz) NMR spectrum of **18a** in  $\text{DMSO-}d_6$

4-Methyl-*N'*-(2-((4-oxo-3,4,5,6,7,8-hexahydroquinazolin-2-yl)thio)acetyl)benzohydrazide (**18b**)

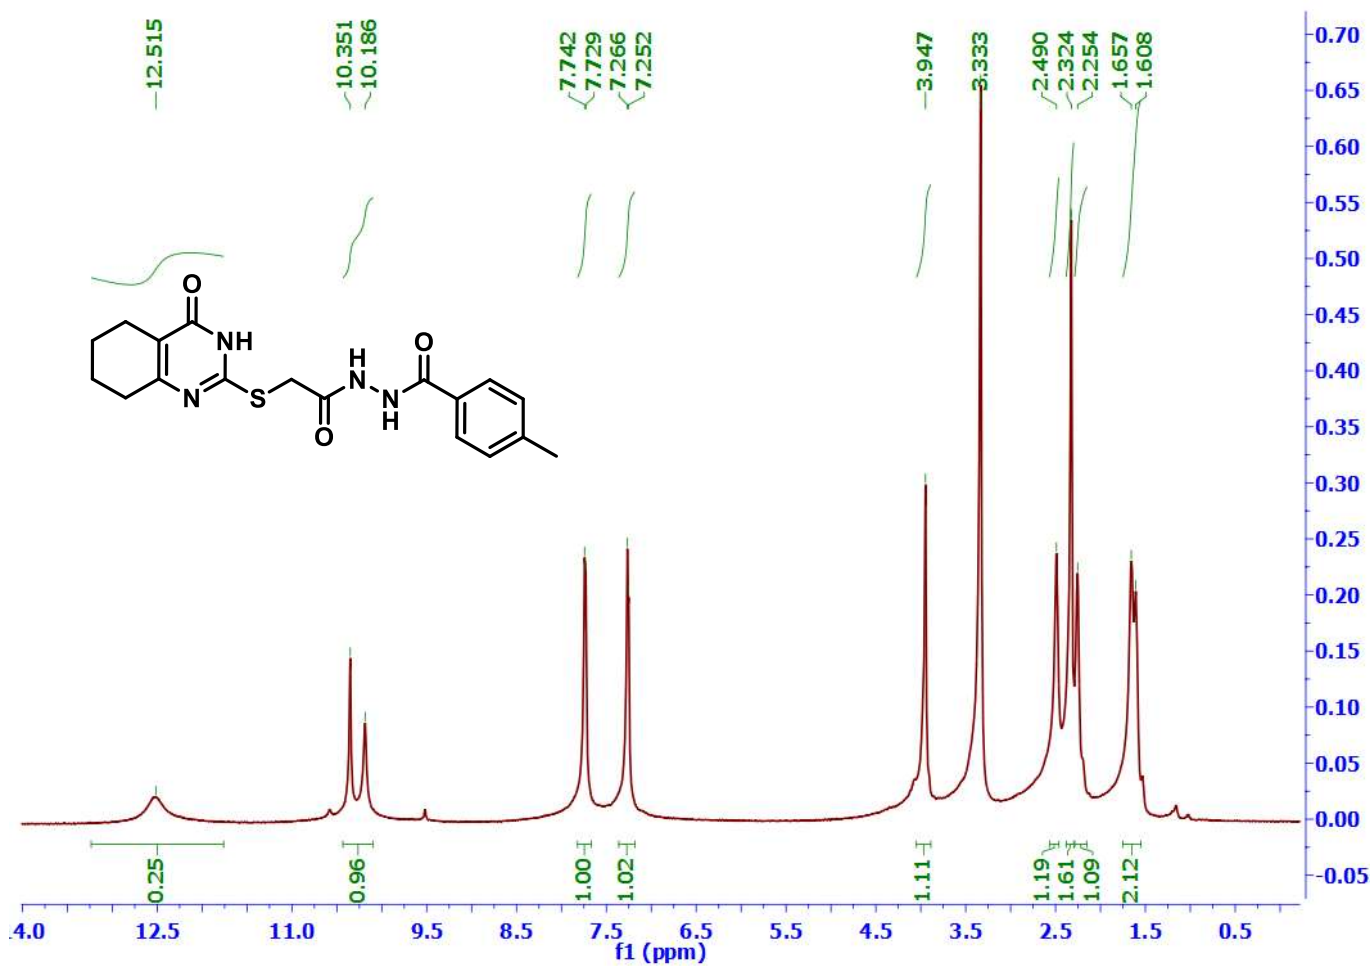

Fig. 27. <sup>1</sup>H (500 MHz) NMR spectrum of **18b** in DMSO-*d*<sub>6</sub>

4-Methyl-*N'*-(2-((4-oxo-3,4,5,6,7,8-hexahydroquinazolin-2-yl)thio)acetyl)benzohydrazide (**18b**)

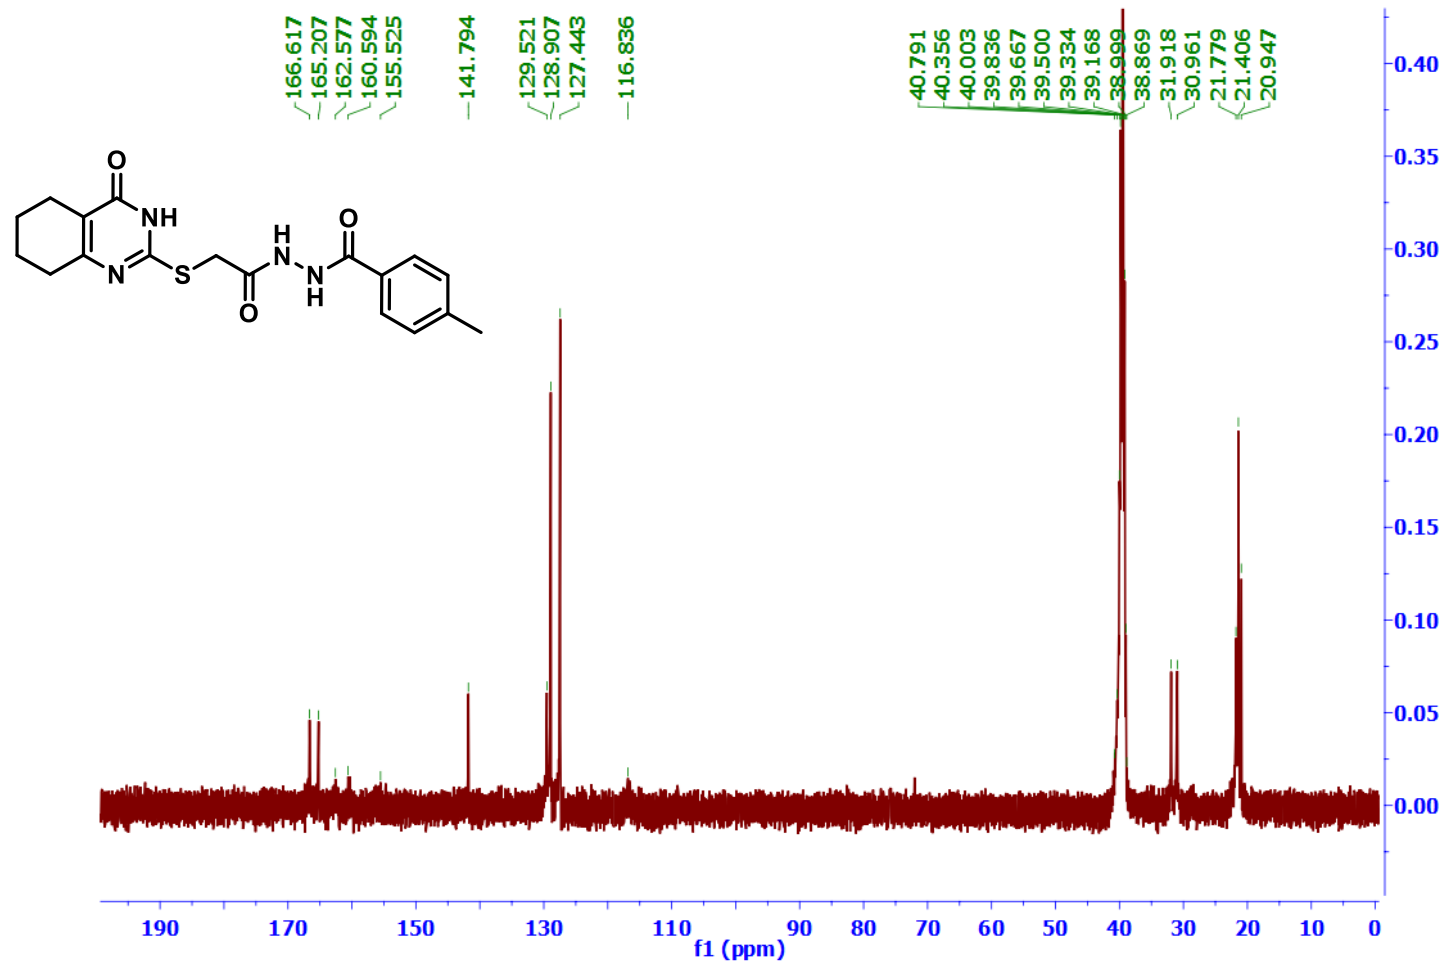

Fig. 28.  $^{13}\text{C}$  (125 MHz) NMR spectrum of **18b** in  $\text{DMSO-}d_6$

4-Nitro-*N'*-(2-((4-oxo-3,4,5,6,7,8-hexahydroquinazolin-2-yl)thio)acetyl)benzohydrazide (**18c**)

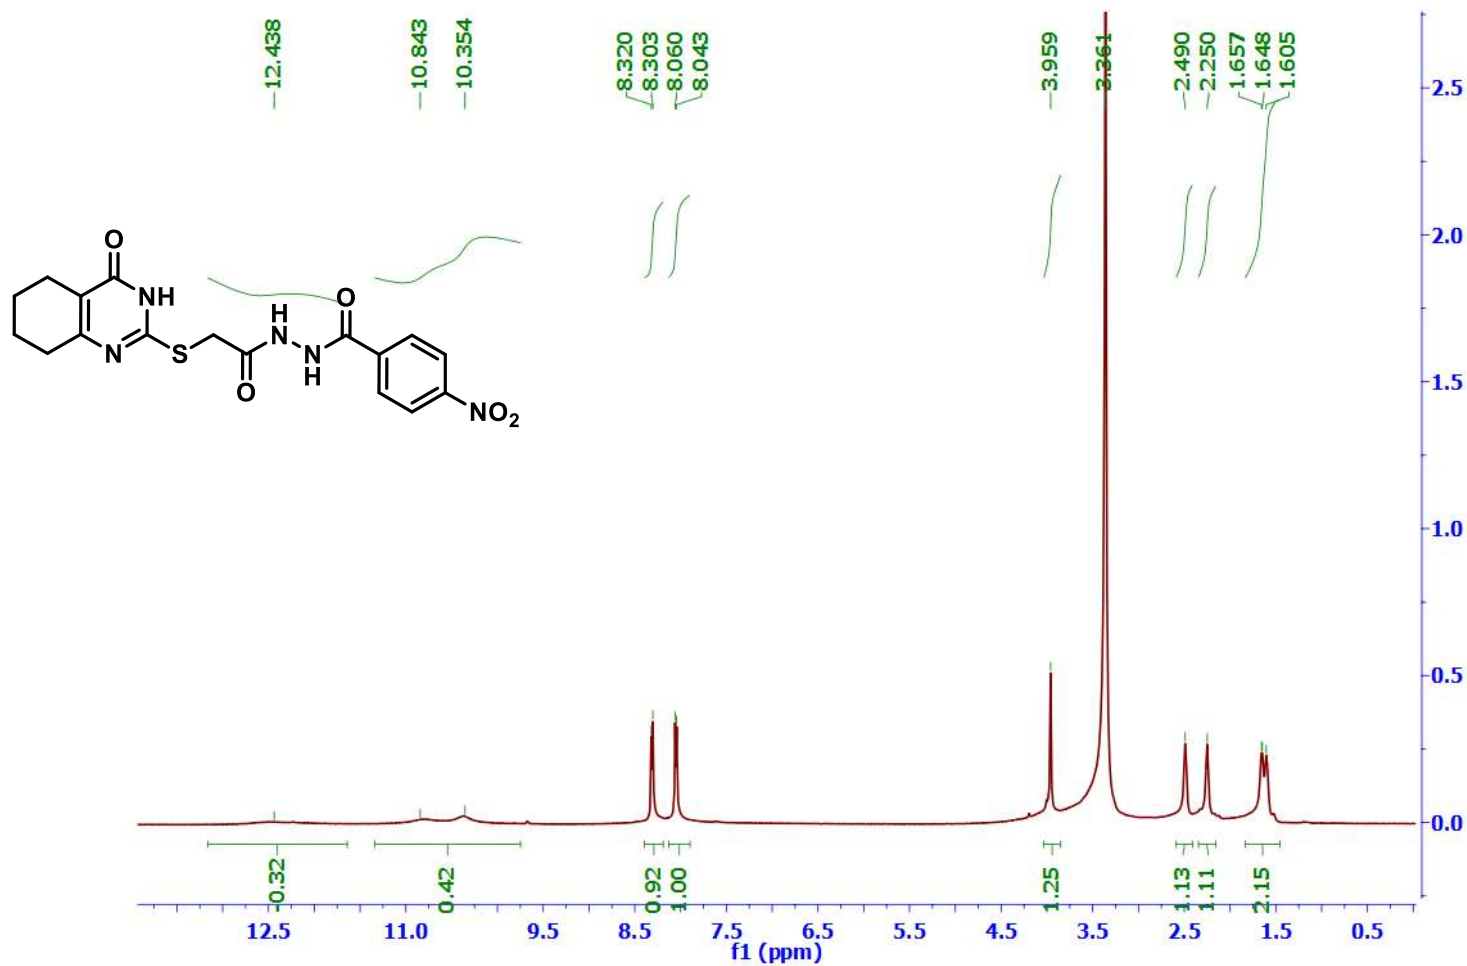

Fig. 29. <sup>1</sup>H (500 MHz) NMR spectrum of **18c** in DMSO-*d*<sub>6</sub>

4-Nitro-*N'*-(2-((4-oxo-3,4,5,6,7,8-hexahydroquinazolin-2-yl)thio)acetyl)benzohydrazide (**18c**)

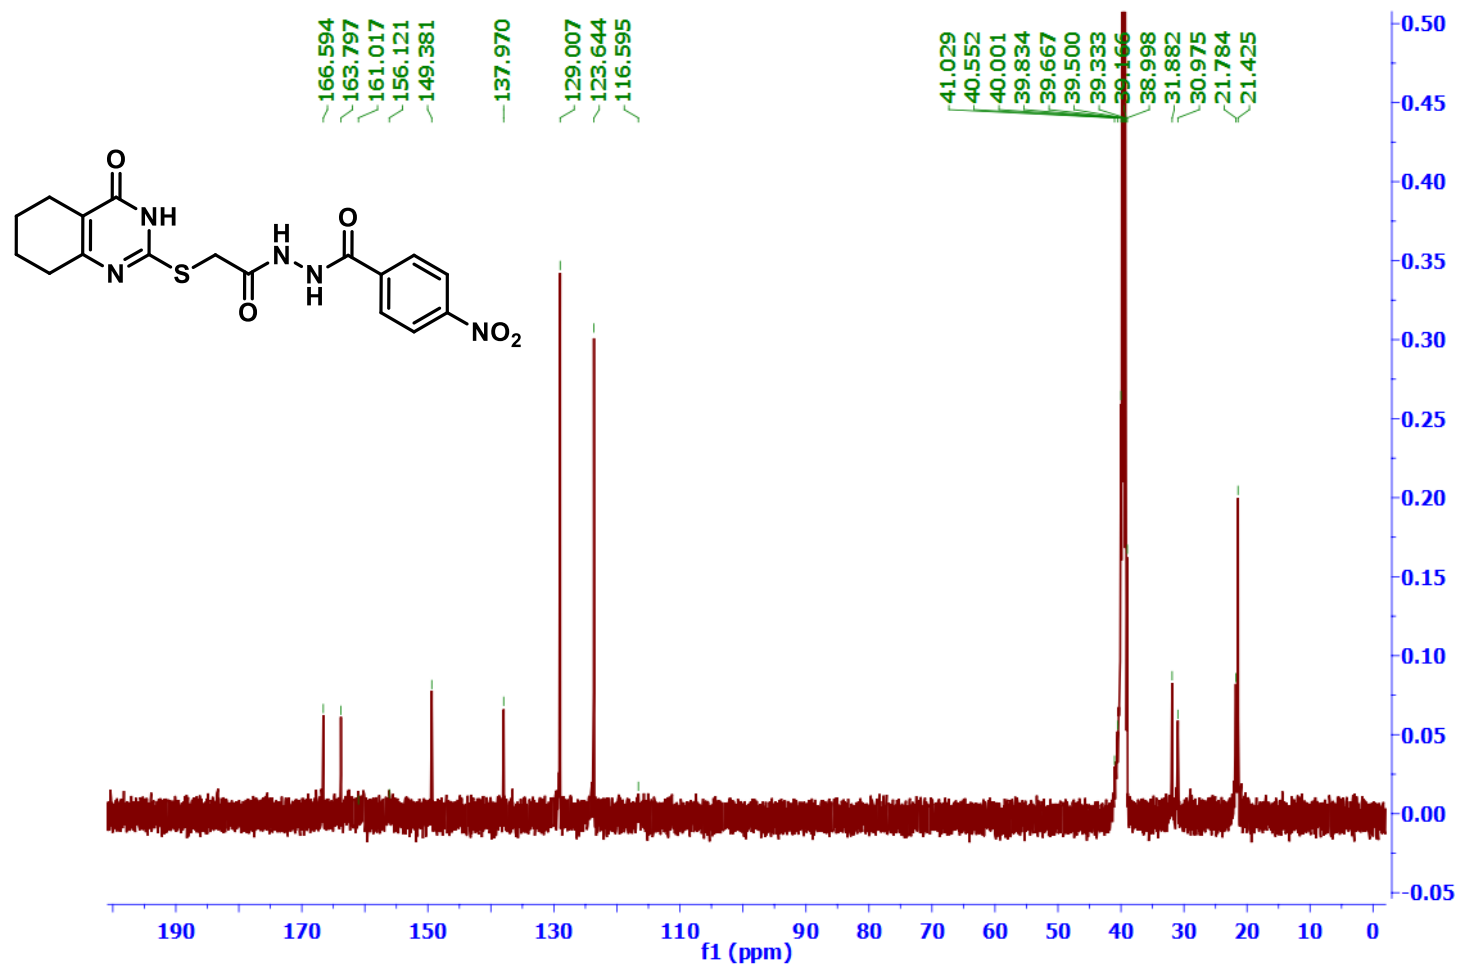

**Fig. 30.** <sup>13</sup>C (125 MHz) NMR spectrum of **18c** in DMSO-*d*<sub>6</sub>



2-Methoxy-*N'*-(2-((4-oxo-3,4,5,6,7,8-hexahydroquinazolin-2-yl)thio)acetyl)benzohydrazide (**18d**)

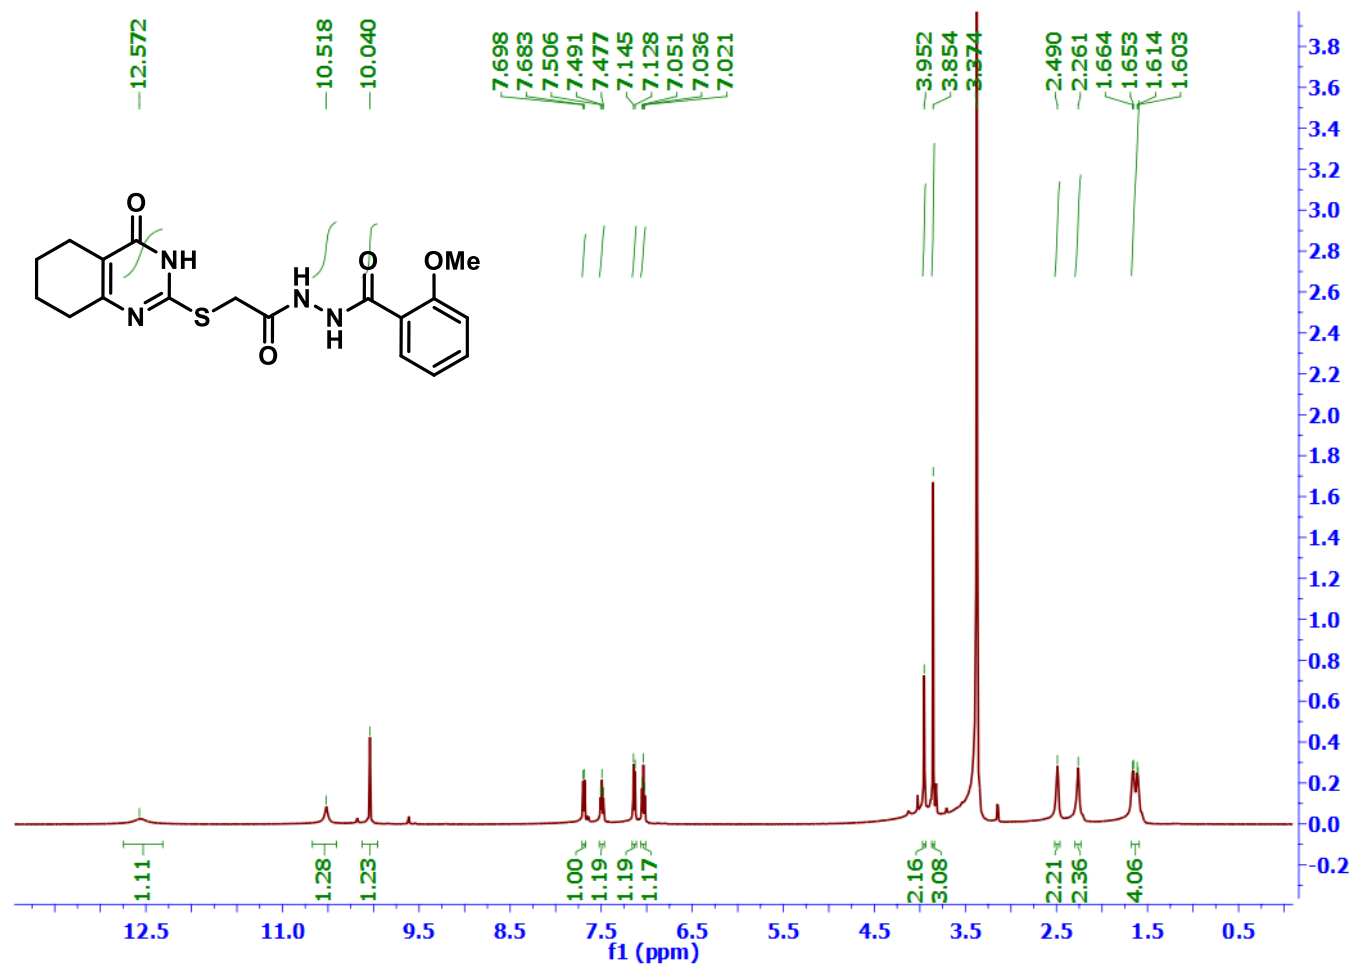

Fig. 31. <sup>1</sup>H (500 MHz) NMR spectrum of **18d** in DMSO-*d*<sub>6</sub>

2-Methoxy-*N'*-(2-((4-oxo-3,4,5,6,7,8-hexahydroquinazolin-2-yl)thio)acetyl)benzohydrazide (**18d**)

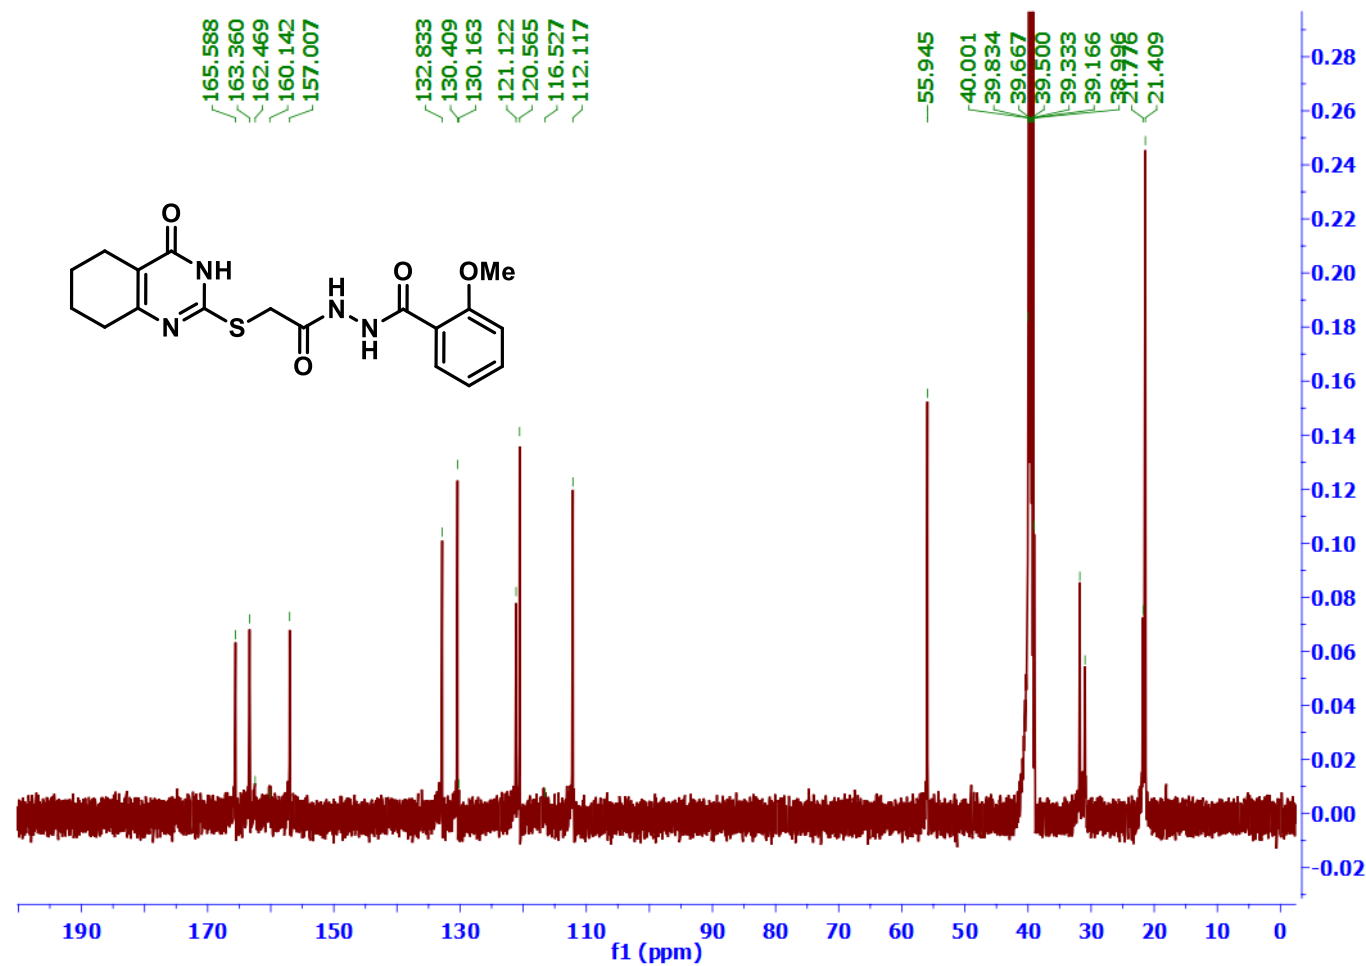

Fig. 32.  $^{13}\text{C}$  (125 MHz) NMR spectrum of **18d** in  $\text{DMSO-}d_6$

2-Chloro-*N'*-(2-((4-oxo-3,4,5,6,7,8-hexahydroquinazolin-2-yl)thio)acetyl)benzohydrazide (**18e**)

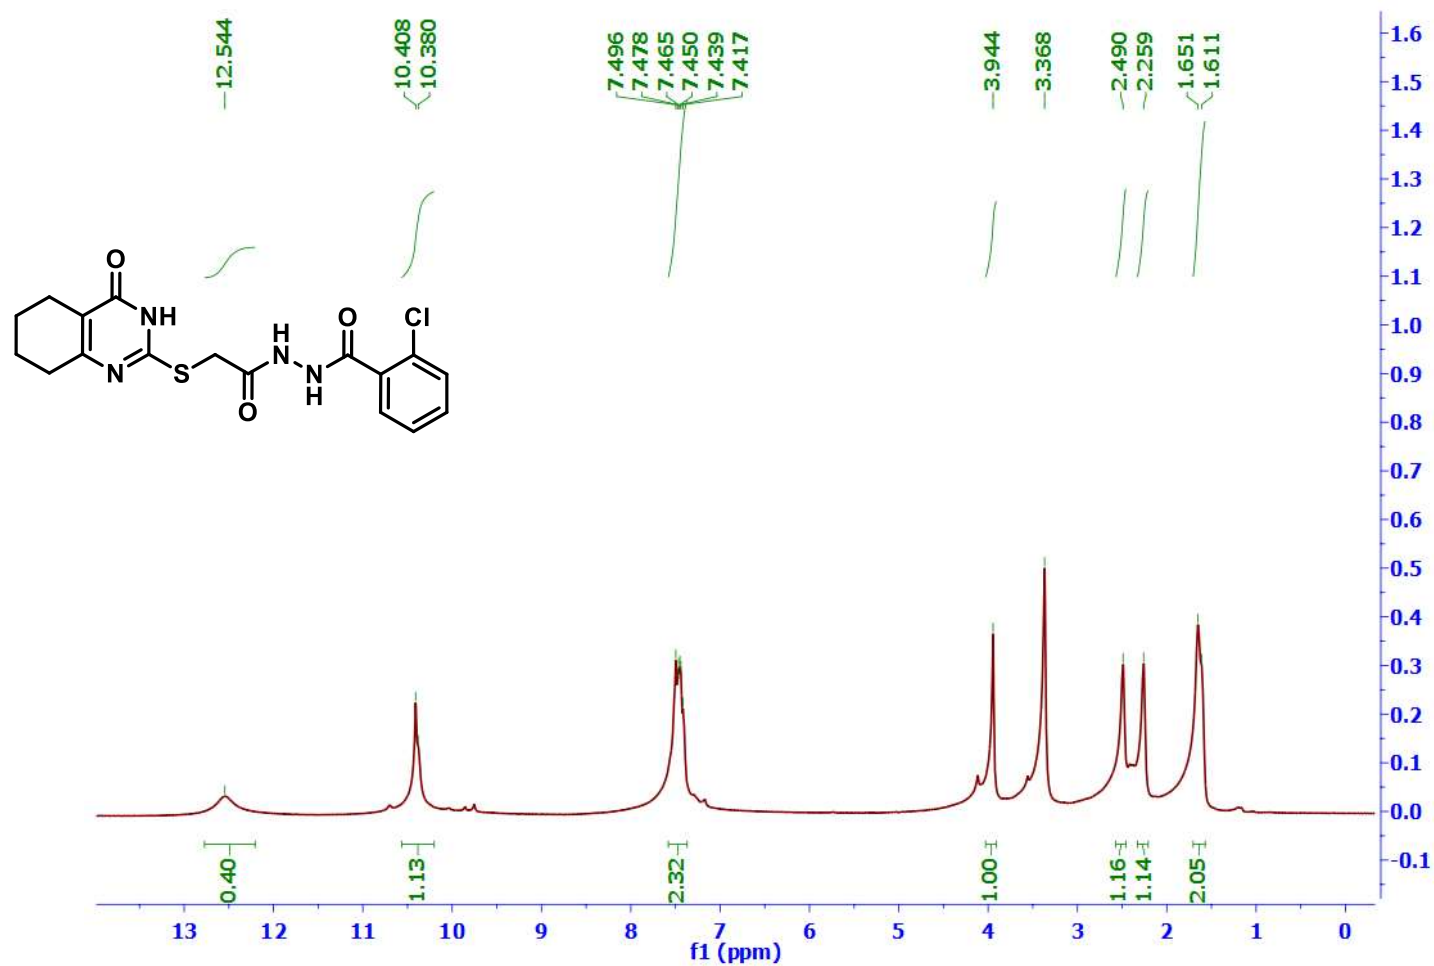

Fig. 33. <sup>1</sup>H (500 MHz) NMR spectrum of **18e** in DMSO-*d*<sub>6</sub>

2-Chloro-*N'*-(2-((4-oxo-3,4,5,6,7,8-hexahydroquinazolin-2-yl)thio)acetyl)benzohydrazide (**18e**)

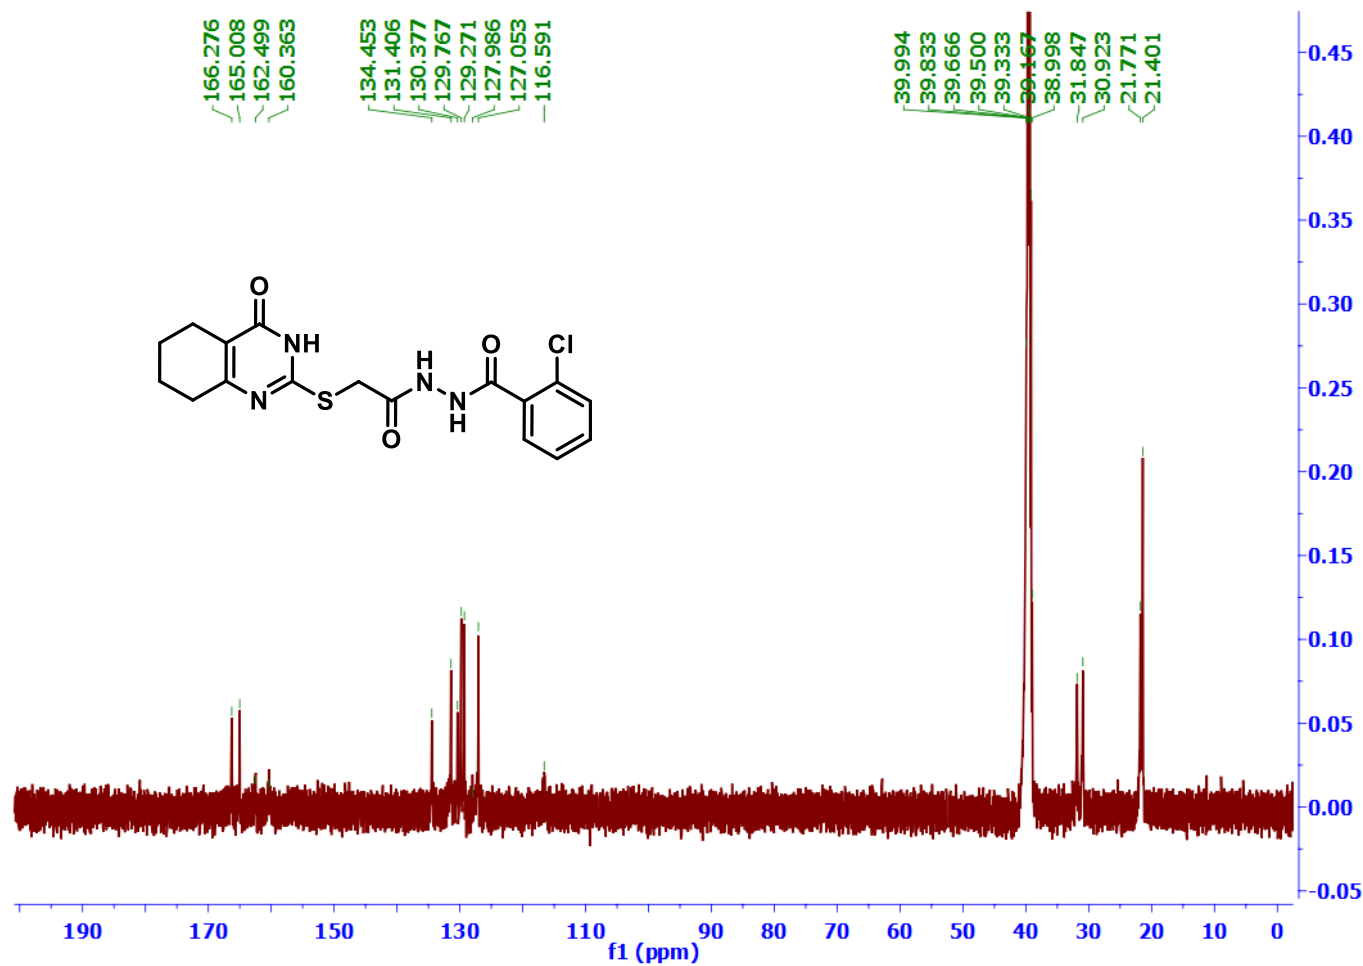

Fig. 34.  $^{13}\text{C}$  (125 MHz) NMR spectrum of **18e** in  $\text{DMSO-}d_6$

4-Chloro-*N'*-(2-((4-oxo-3,4,5,6,7,8-hexahydroquinazolin-2-yl)thio)acetyl)benzohydrazide (**18f**)

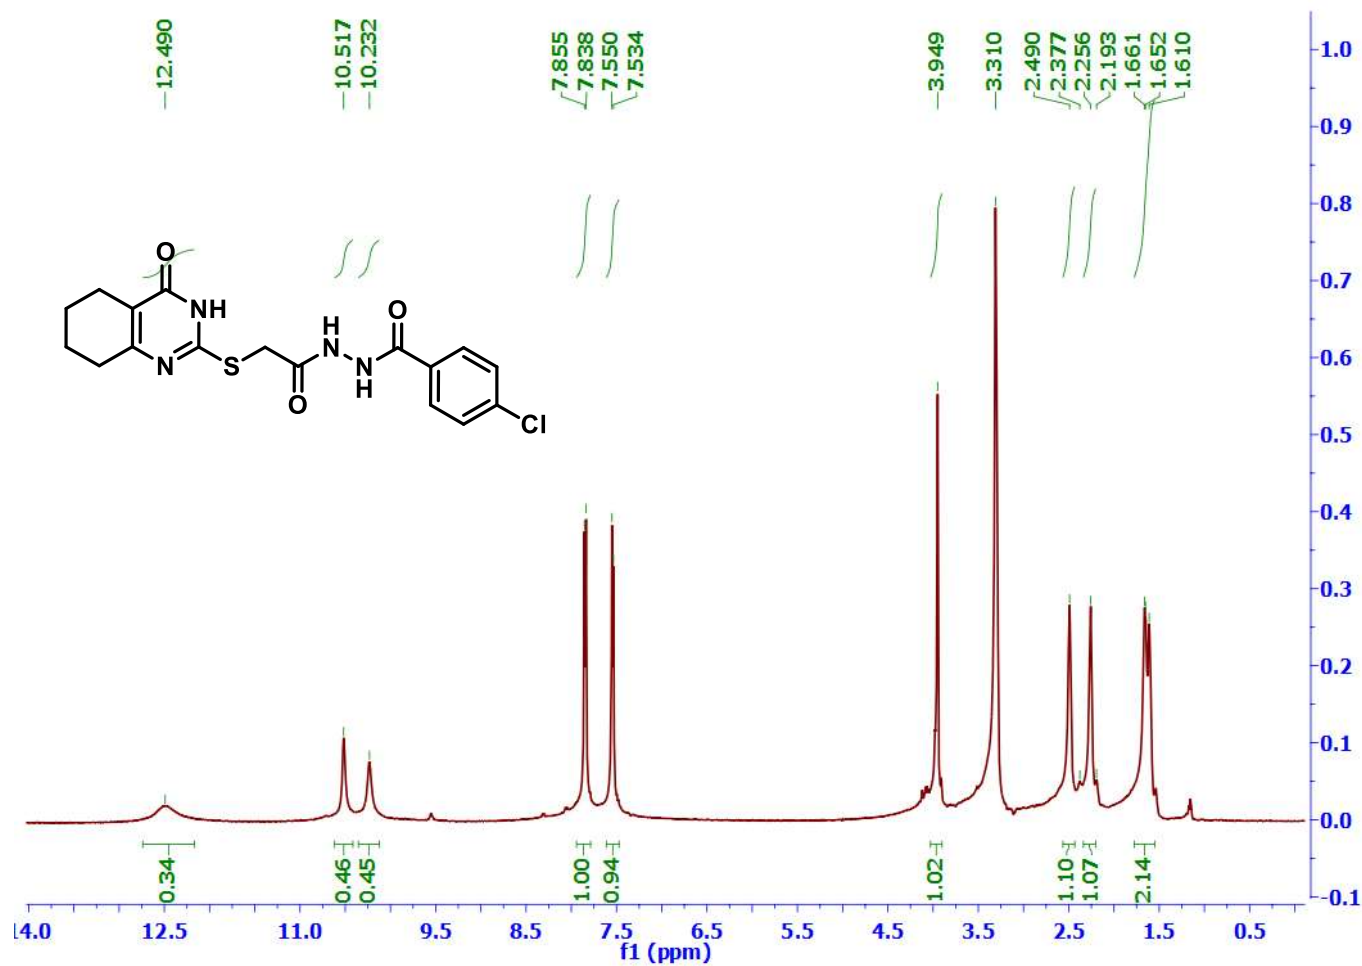

Fig. 35. <sup>1</sup>H (500 MHz) NMR spectrum of **18f** in DMSO-*d*<sub>6</sub>

4-Chloro-*N'*-(2-((4-oxo-3,4,5,6,7,8-hexahydroquinazolin-2-yl)thio)acetyl)benzohydrazide (**18f**)

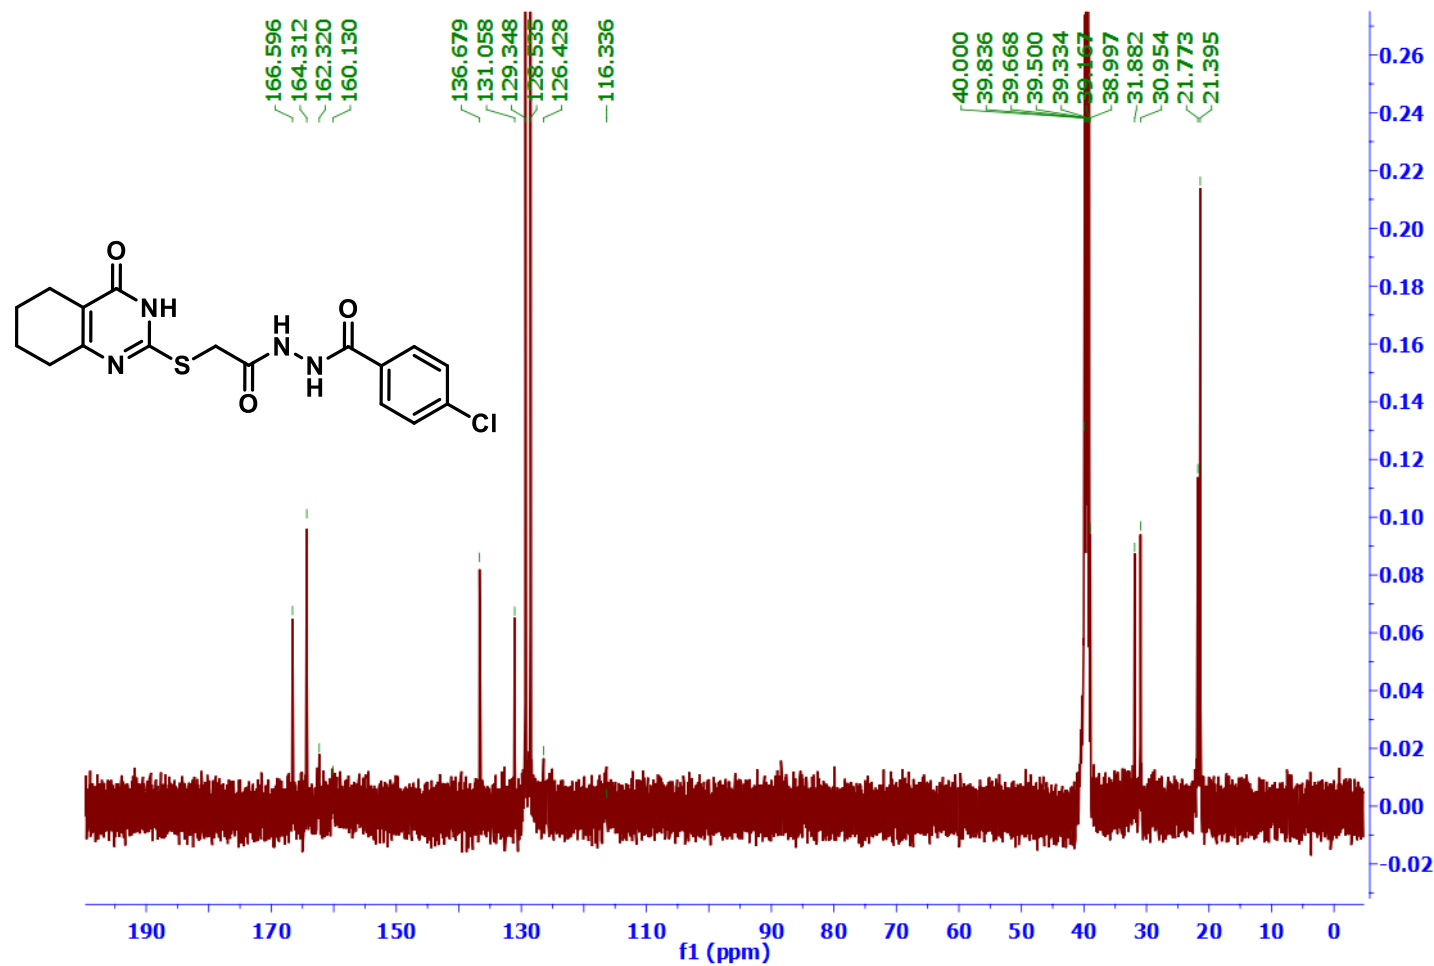

Fig. 36 <sup>13</sup>C (125 MHz) NMR spectrum of **18f** in DMSO-*d*<sub>6</sub>

2-Bromo-*N'*-(2-((4-oxo-3,4,5,6,7,8-hexahydroquinazolin-2-yl)thio)acetyl)benzohydrazide (**18g**)

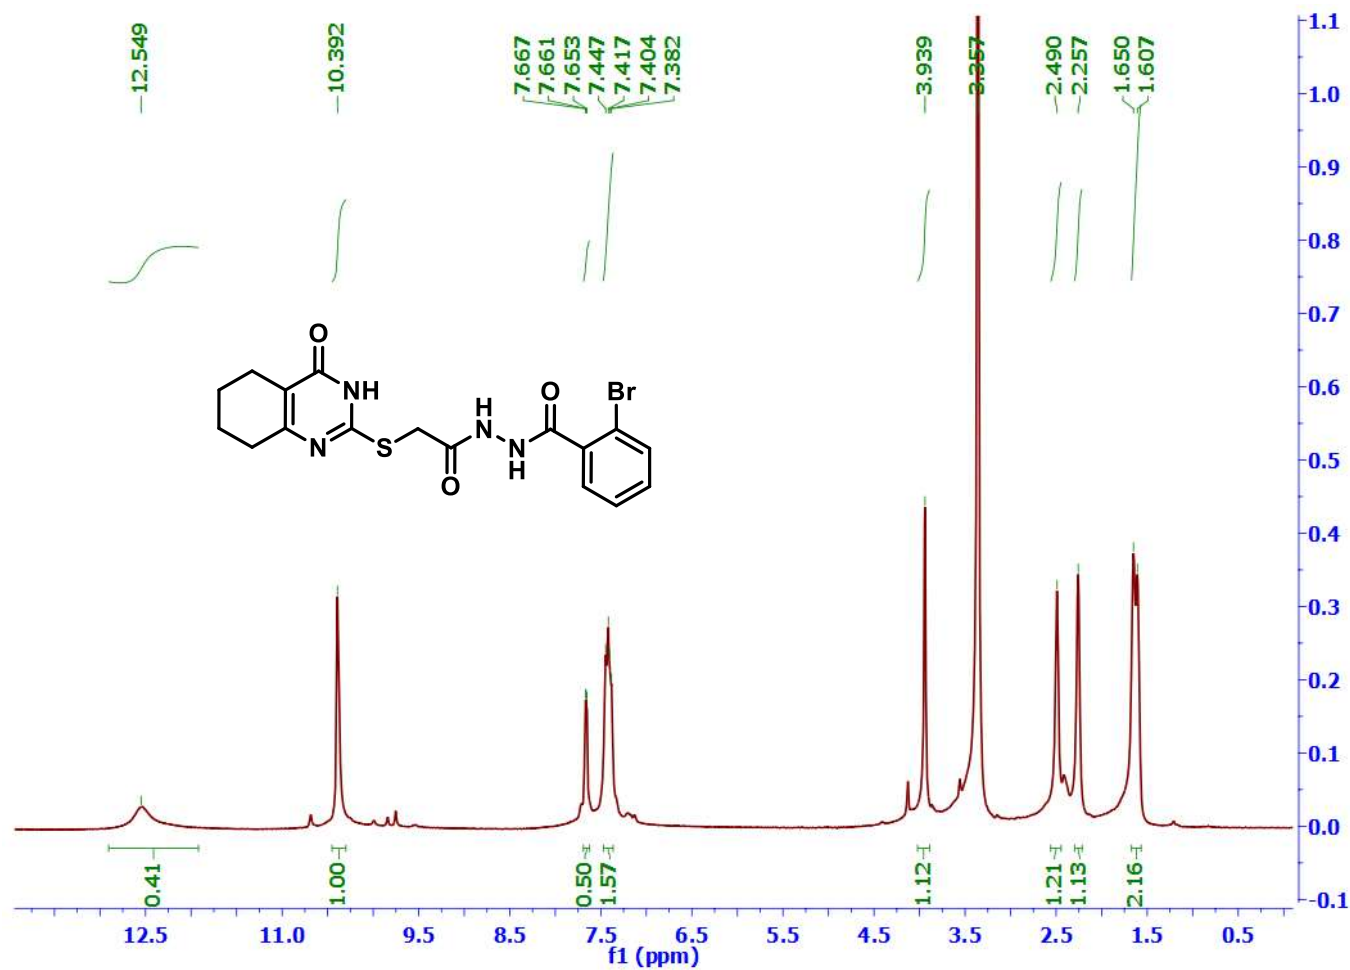

Fig. 37. <sup>1</sup>H (500 MHz) NMR spectrum of **18g** in DMSO-*d*<sub>6</sub>

2-Bromo-*N'*-(2-((4-oxo-3,4,5,6,7,8-hexahydroquinazolin-2-yl)thio)acetyl)benzohydrazide (**18g**)

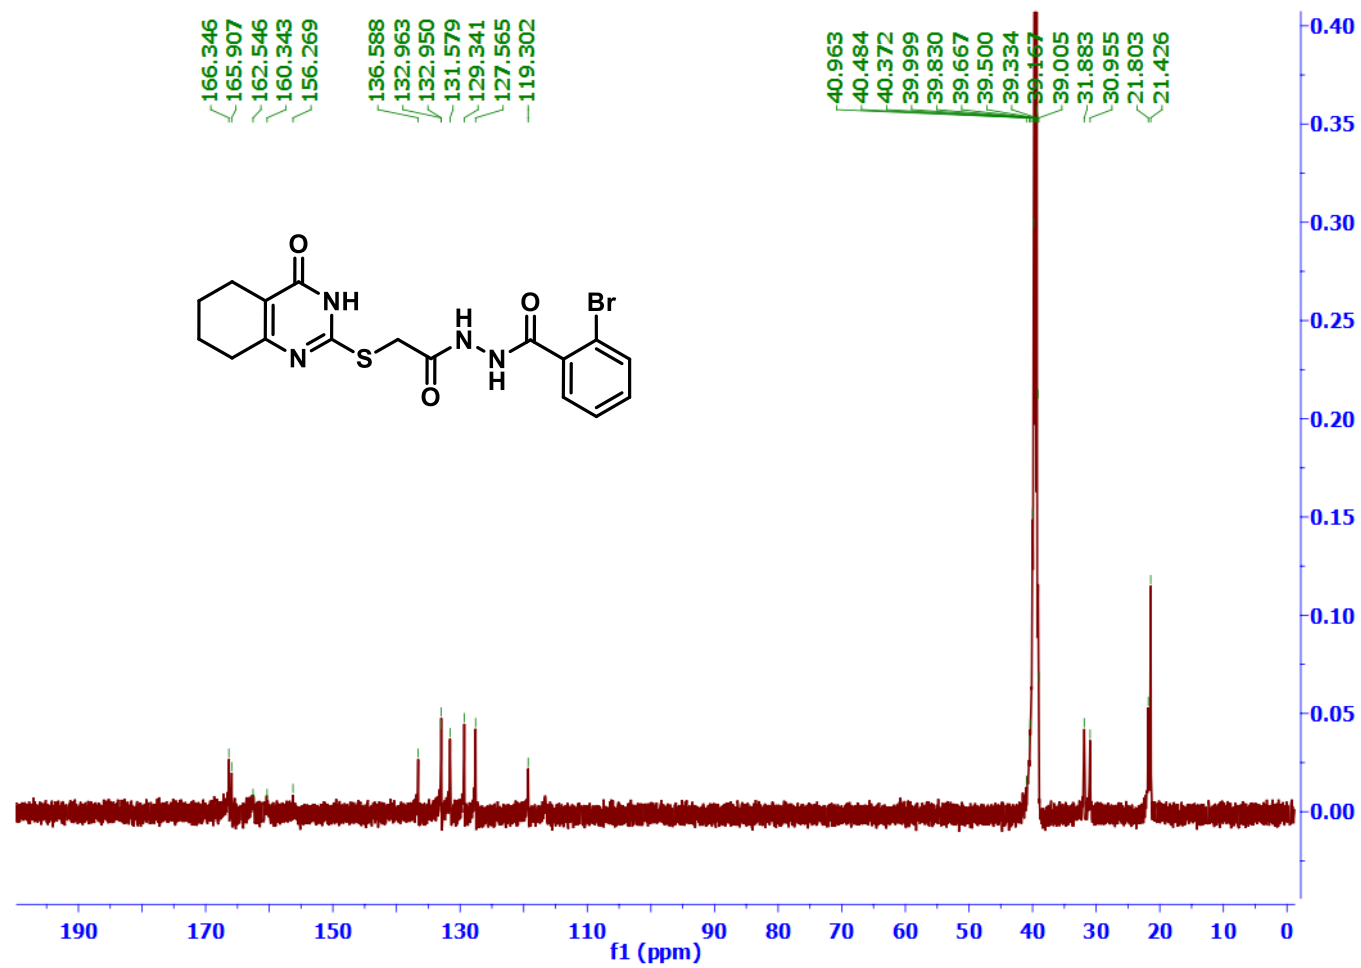

Fig. 38. <sup>13</sup>C (125 MHz) NMR spectrum of **18g** in DMSO-*d*<sub>6</sub>



2. Dose-inhibition curves of the synthesized derivatives against NRC-03-nhCoV and Vero-E6 cells (Fig. 39)

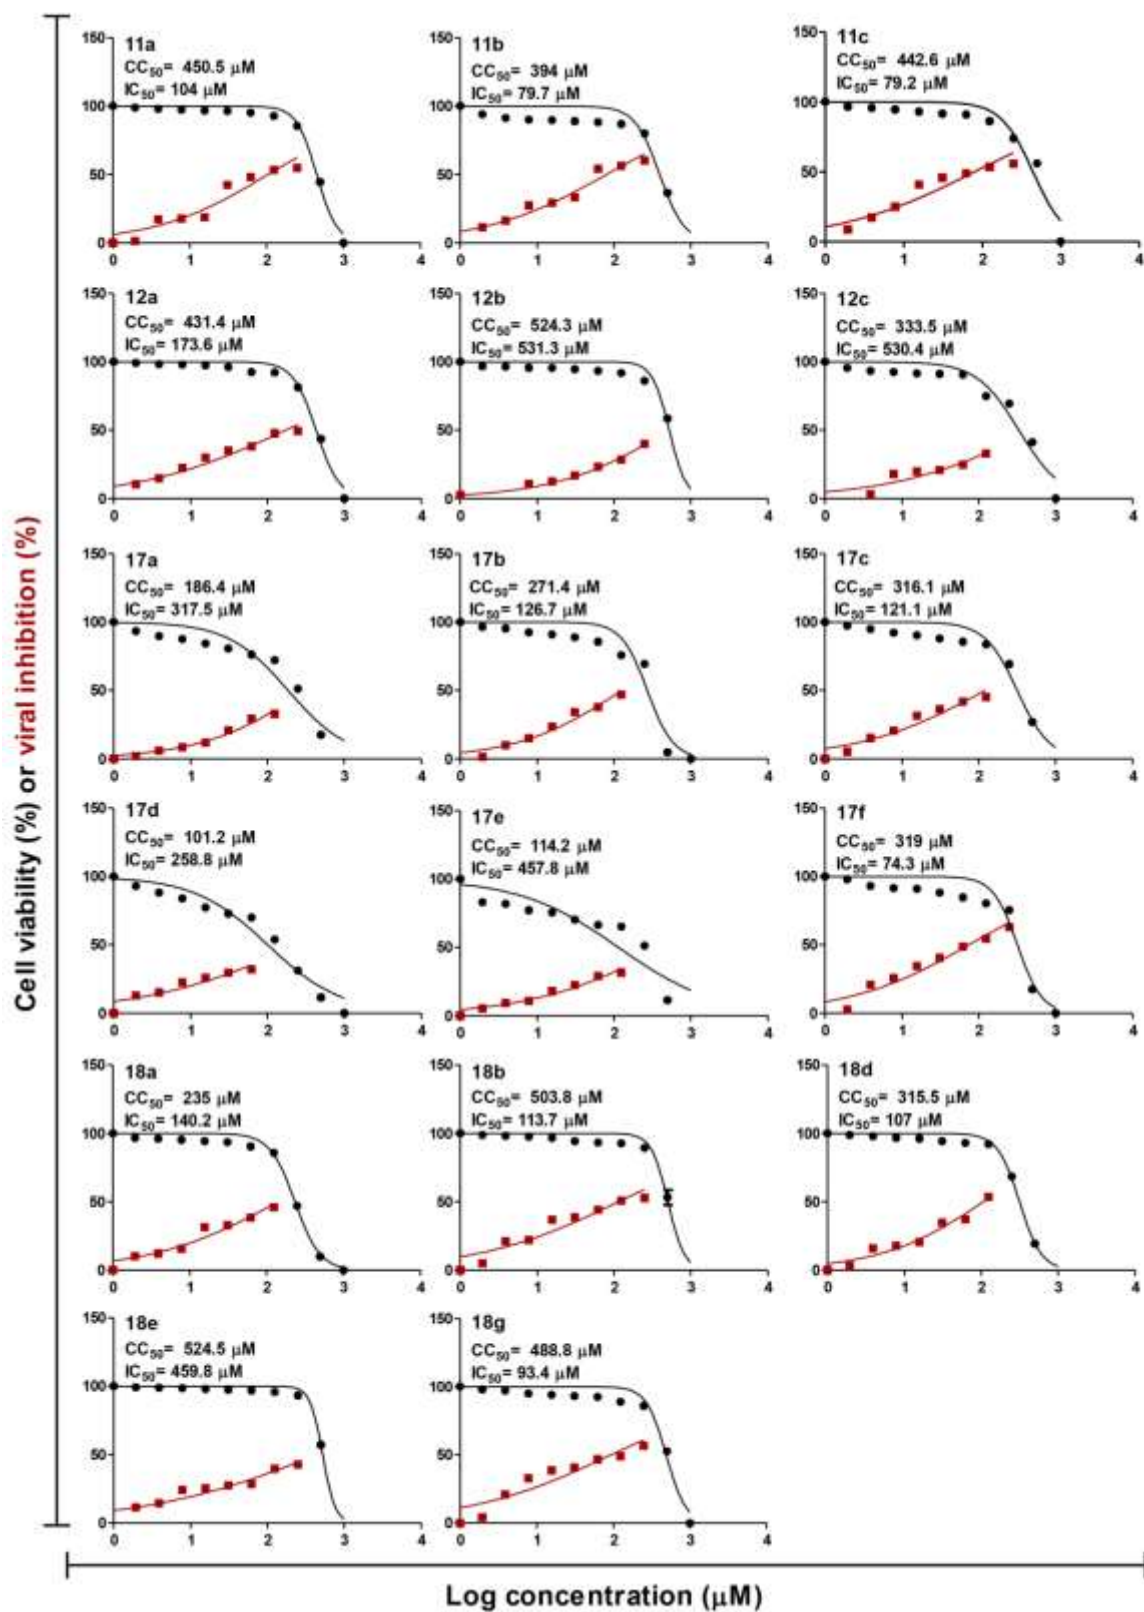

Fig. 39. Dose-inhibition curves of the synthesized derivatives against NRC-03-nhCoV and Vero-E6 cells

3. 2D diagrams of the synthesized compounds showing their interactions in M<sup>pro</sup> active site (PDB ID: 7LTJ) (Fig. 40-59).

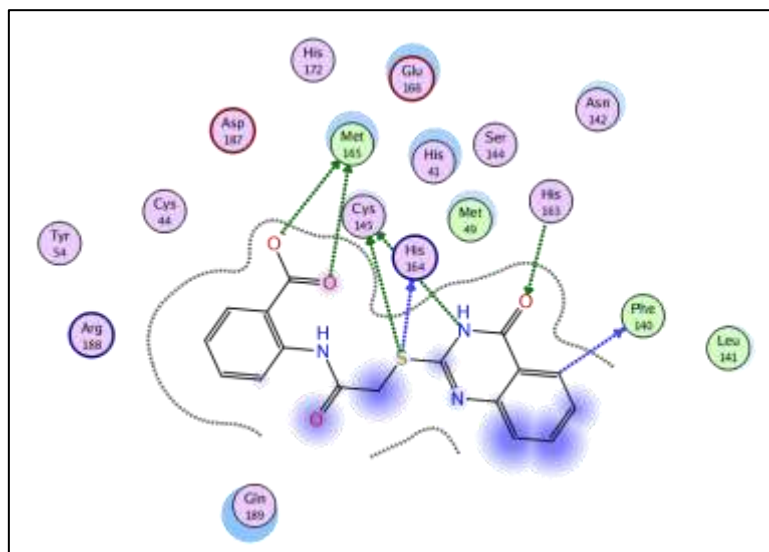

**Fig. 40.** 2D diagram 11a showing its interaction in M<sup>pro</sup> active site

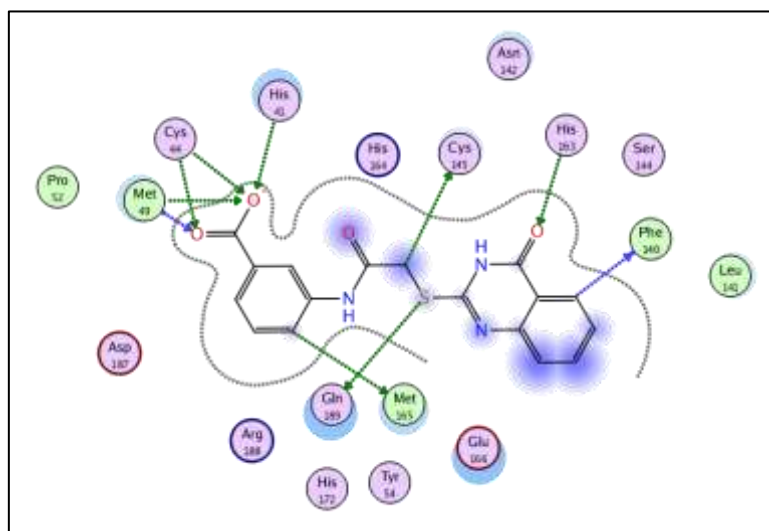

**Fig. 41.** 2D diagram 11b showing its interaction in M<sup>pro</sup> active site

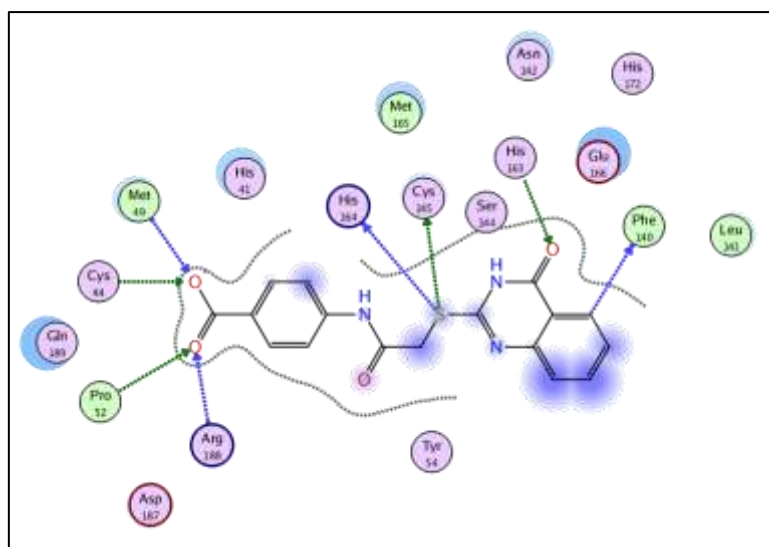

**Fig. 42.** 2D diagram **11c** showing its interaction in  $M^{\text{pro}}$  active site

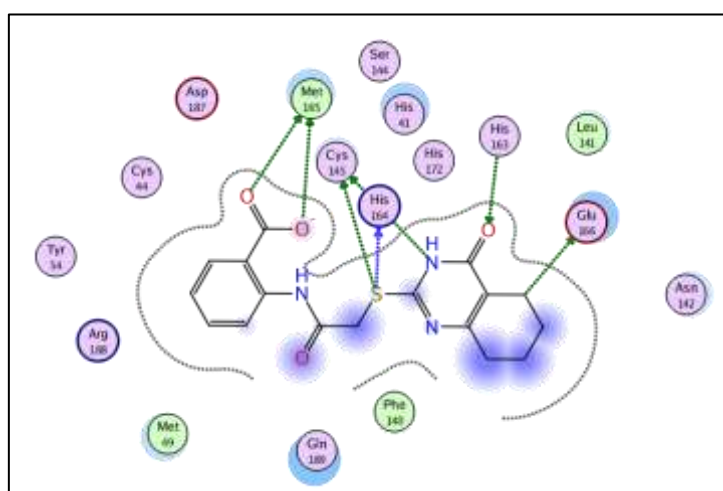

**Fig. 43.** 2D diagram **12a** showing its interaction in  $M^{\text{pro}}$  active site

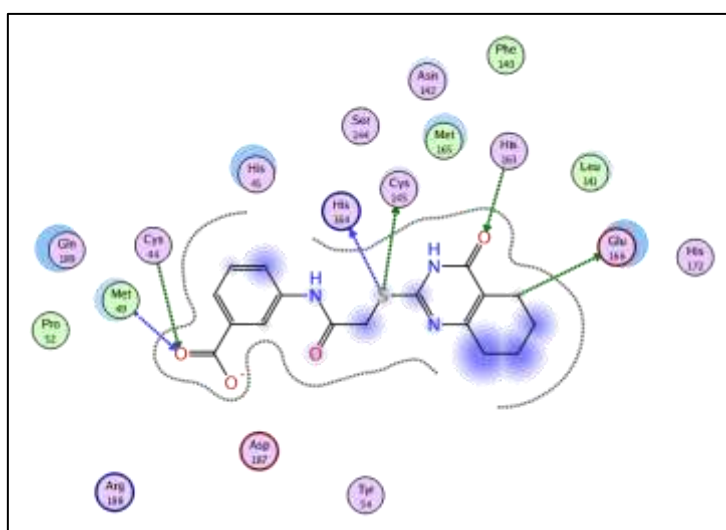

**Fig. 44.** 2D diagram **12b** showing its interaction in  $M^{\text{pro}}$  active site

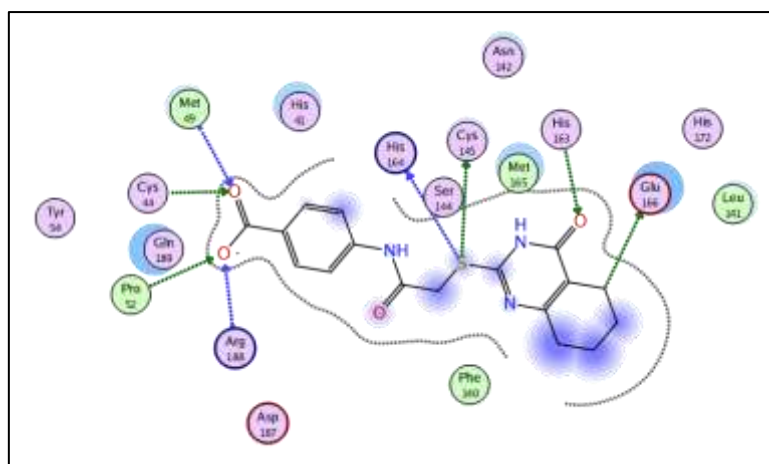

**Fig. 45.** 2D diagram 12c showing its interaction in  $M^{\text{pro}}$  active site

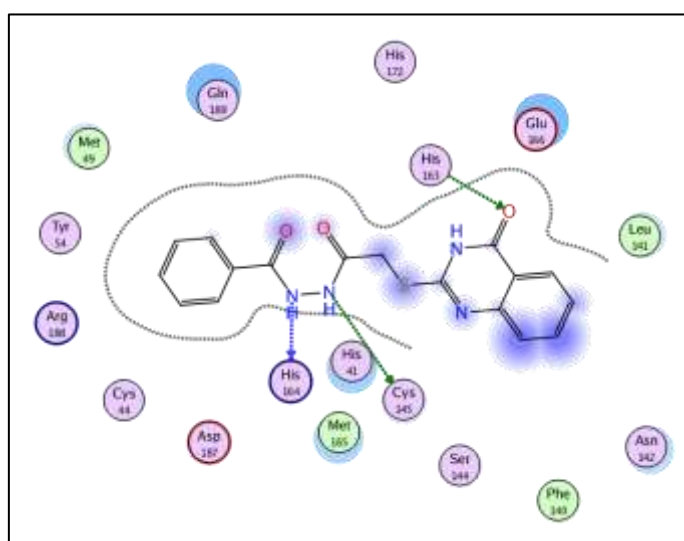

**Fig. 46.** 2D diagram 17a showing its interaction in  $M^{\text{pro}}$  active site

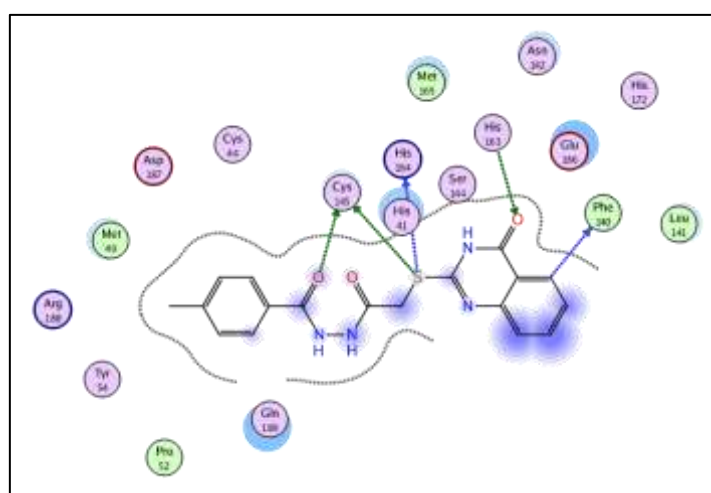

**Fig. 47.** 2D diagram 17b showing its interaction in  $M^{\text{pro}}$  active site

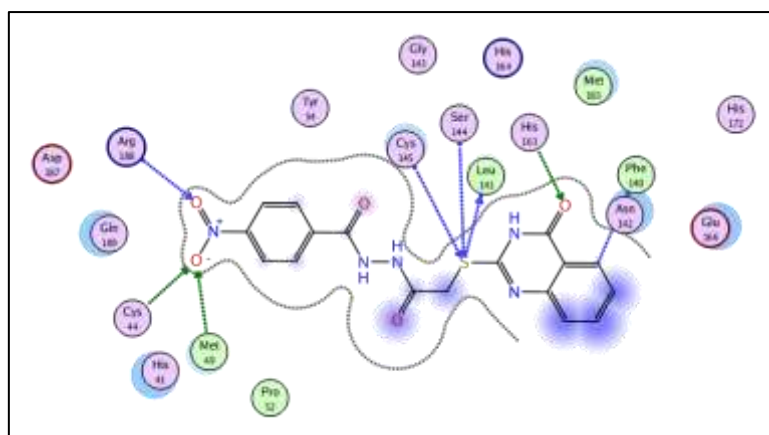

**Fig. 48.** 2D diagram **17c** showing its interaction in  $M^{\text{pro}}$  active site

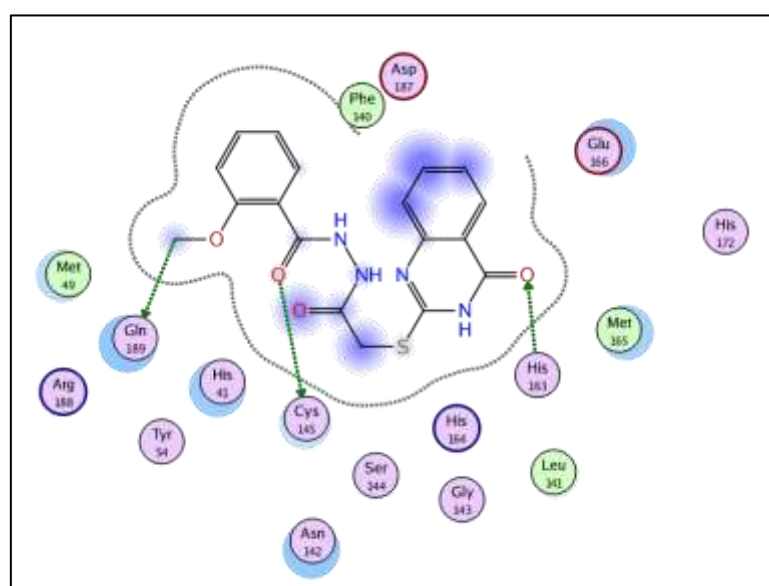

**Fig. 49.** 2D diagram **17d** showing its interaction in  $M^{\text{pro}}$  active site

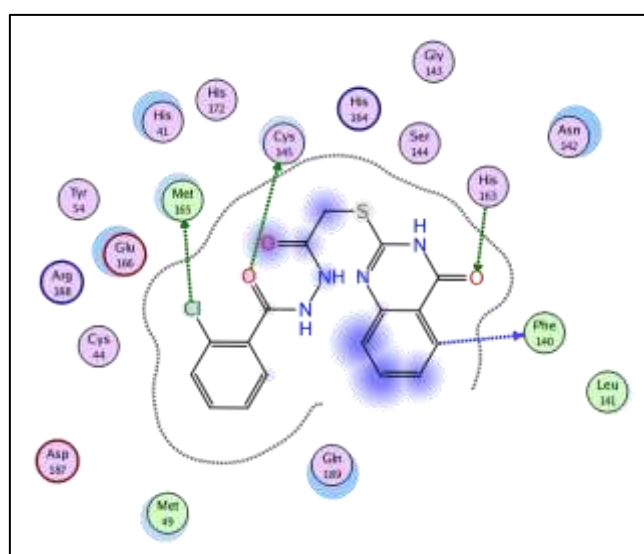

**Fig. 50.** 2D diagram **17e** showing its interaction in  $M^{\text{pro}}$  active site

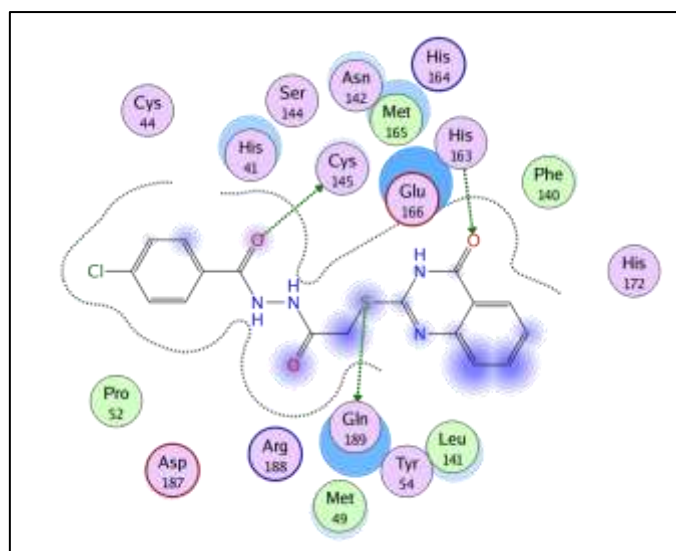

**Fig. 51.** 2D diagram **17f** showing its interaction in  $M^{\text{PRO}}$  active site

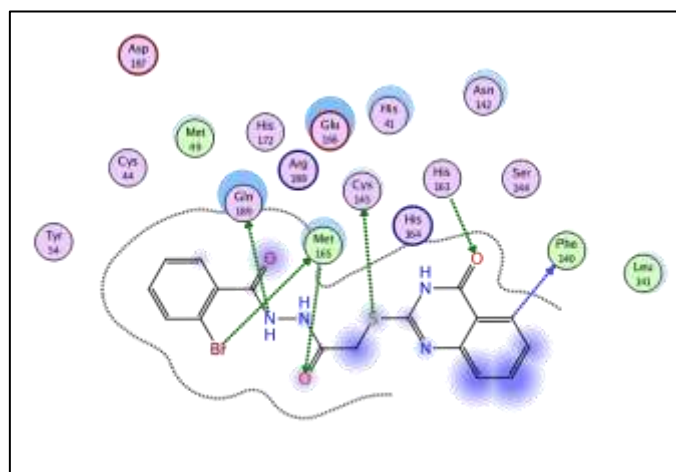

**Fig. 52.** 2D diagram **17g** showing its interaction in  $M^{\text{PRO}}$  active site

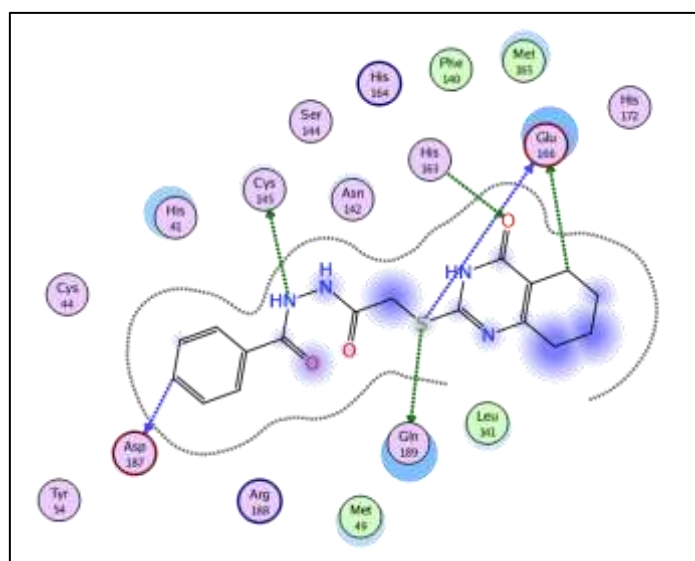

**Fig. 53.** 2D diagram **18a** showing its interaction in  $M^{\text{PRO}}$  active site

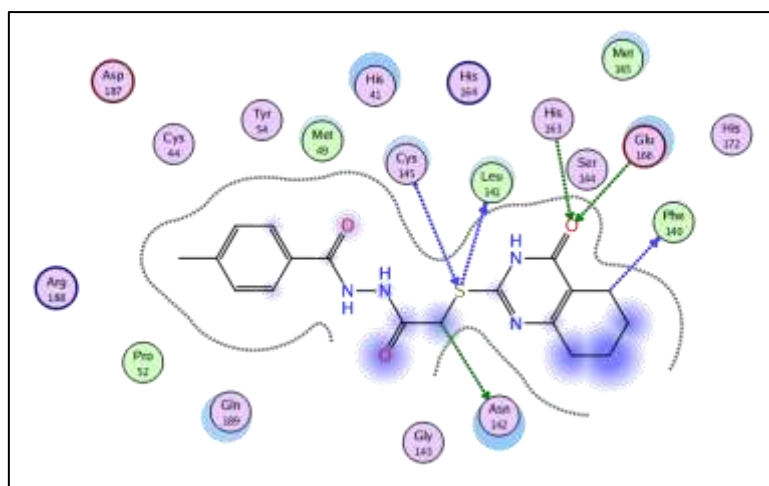

**Fig. 54.** 2D diagram **18b** showing its interaction in  $M^{\text{pro}}$  active site

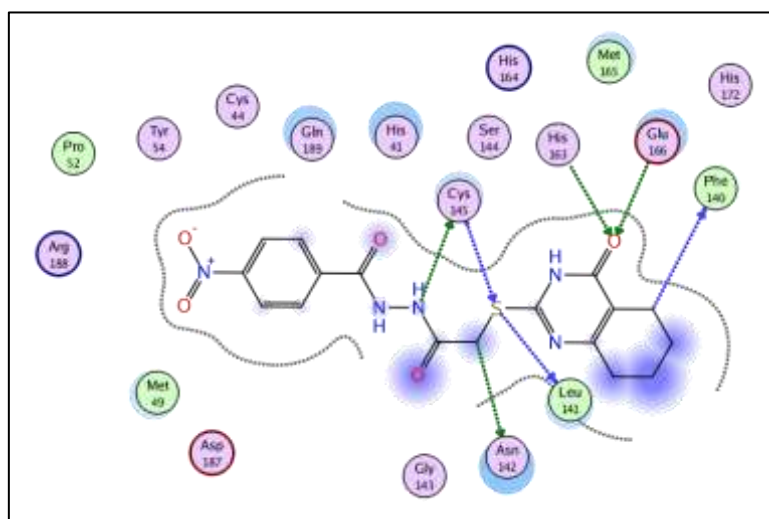

**Fig. 55.** 2D diagram **18c** showing its interaction in  $M^{\text{pro}}$  active site

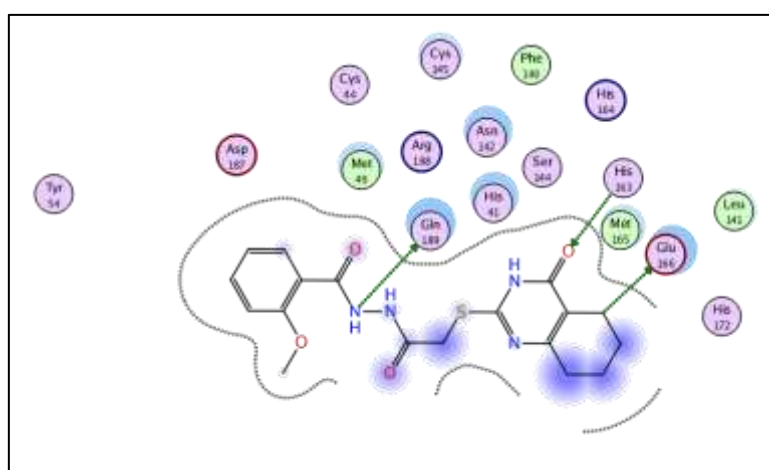

**Fig. 56.** 2D diagram **18d** showing its interaction in  $M^{\text{pro}}$  active site



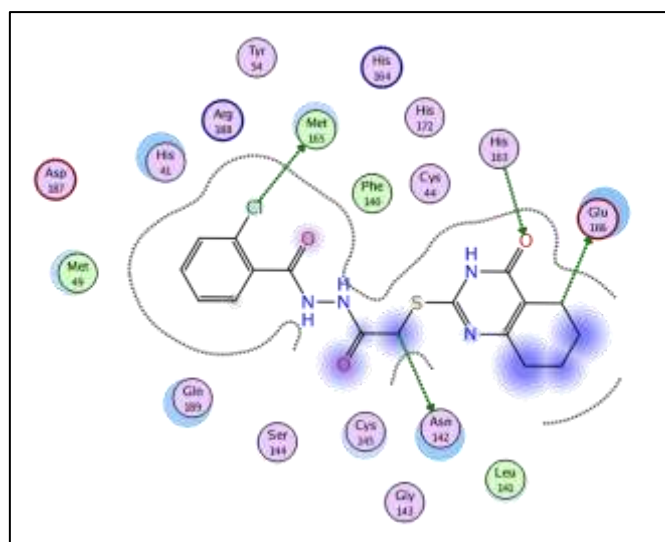

**Fig. 57.** 2D diagram **18e** showing its interaction in  $M^{pro}$  active site

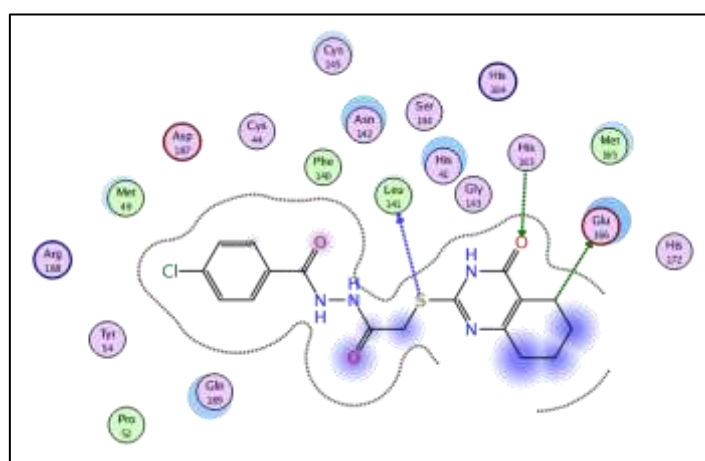

**Fig. 58.** 2D diagram **18f** showing its interaction in  $M^{pro}$  active site

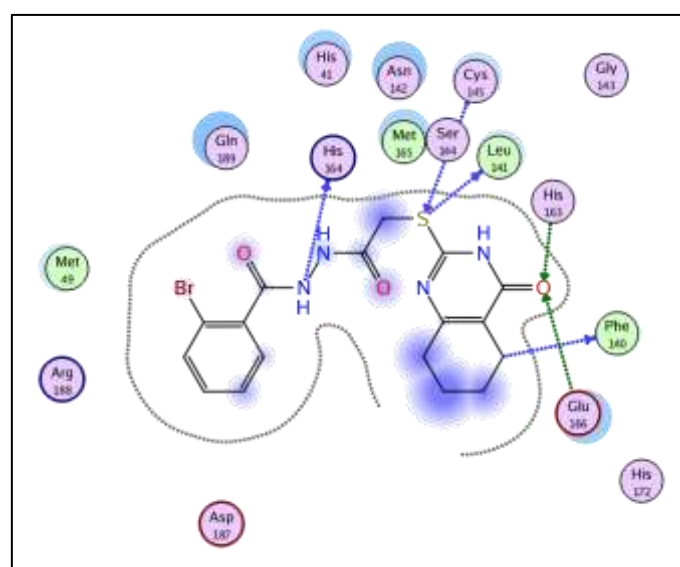

**Fig. 59.** 2D diagram **18g** showing its interaction in  $M^{pro}$  active site
